# Supplementary material for: Evaluation of an outreach programme for patients with COVID-19 in an integrated healthcare delivery system: a retrospective cohort study
Source: PubMed Central journal article supplement — BMJ Open. 2024 Jan 8;14(1):e073622. doi: 10.1136/bmjopen-2023-073622 (PMC10806839; doi:10.1136/bmjopen-2023-073622), 2024-01-08
Supplement: bmjopen-2023-073622.draft_revisions.pdf [file bmjopen-2023-073622.draft_revisions.pdf]

# BMJ Open

BMJ Open is committed to open peer review. As part of this commitment we make the peer review history of every article we publish publicly available.

When an article is published we post the peer reviewers' comments and the authors' responses online. We also post the versions of the paper that were used during peer review. These are the versions that the peer review comments apply to.

The versions of the paper that follow are the versions that were submitted during the peer review process. They are not the versions of record or the final published versions. They should not be cited or distributed as the published version of this manuscript.

BMJ Open is an open access journal and the full, final, typeset and author-corrected version of record of the manuscript is available on our site with no access controls, subscription charges or pay-per-view fees (<http://bmjopen.bmj.com>).

If you have any questions on BMJ Open's open peer review process please email [info.bmjopen@bmj.com](mailto:info.bmjopen@bmj.com)

# BMJ Open

## Impact of an outreach program for patients with COVID-19 in an integrated healthcare delivery system

|                               |                                                                                                                                                                                                                                                                                                                                                                                                                                                                                                                                                                                                                 |
|-------------------------------|-----------------------------------------------------------------------------------------------------------------------------------------------------------------------------------------------------------------------------------------------------------------------------------------------------------------------------------------------------------------------------------------------------------------------------------------------------------------------------------------------------------------------------------------------------------------------------------------------------------------|
| Journal:                      | <i>BMJ Open</i>                                                                                                                                                                                                                                                                                                                                                                                                                                                                                                                                                                                                 |
| Manuscript ID                 | bmjopen-2023-073622                                                                                                                                                                                                                                                                                                                                                                                                                                                                                                                                                                                             |
| Article Type:                 | Original research                                                                                                                                                                                                                                                                                                                                                                                                                                                                                                                                                                                               |
| Date Submitted by the Author: | 14-Mar-2023                                                                                                                                                                                                                                                                                                                                                                                                                                                                                                                                                                                                     |
| Complete List of Authors:     | Myers, Laura ; Kaiser Permanente, Division of Research; The Permanente Medical Group Inc<br>Lawson, Brian L.; Kaiser Permanente, Division of Research<br>Escobar, Gabriel; Kaiser Permanente, Division of Research; The Permanente Medical Group Inc<br>Daly, Kathleen ; Kaiser Permanente, Division of Research; The Permanente Medical Group Inc<br>Chen, Yi-fen; The Permanente Medical Group Inc<br>Dlott, Richard; The Permanente Medical Group Inc<br>Lee, Catherine; Kaiser Permanente, Division of Research<br>Liu, Vincent; Kaiser Permanente, Division of Research; The Permanente Medical Group Inc, |
| Keywords:                     | COVID-19, PUBLIC HEALTH, Public health < INFECTIOUS DISEASES                                                                                                                                                                                                                                                                                                                                                                                                                                                                                                                                                    |
|                               |                                                                                                                                                                                                                                                                                                                                                                                                                                                                                                                                                                                                                 |

SCHOLARONE™  
Manuscripts

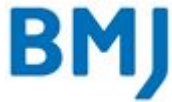

I, the Submitting Author has the right to grant and does grant on behalf of all authors of the Work (as defined in the below author licence), an exclusive licence and/or a non-exclusive licence for contributions from authors who are: i) UK Crown employees; ii) where BMJ has agreed a CC-BY licence shall apply, and/or iii) in accordance with the terms applicable for US Federal Government officers or employees acting as part of their official duties; on a worldwide, perpetual, irrevocable, royalty-free basis to BMJ Publishing Group Ltd ("BMJ") its licensees and where the relevant Journal is co-owned by BMJ to the co-owners of the Journal, to publish the Work in this journal and any other BMJ products and to exploit all rights, as set out in our [licence](#).

The Submitting Author accepts and understands that any supply made under these terms is made by BMJ to the Submitting Author unless you are acting as an employee on behalf of your employer or a postgraduate student of an affiliated institution which is paying any applicable article publishing charge ("APC") for Open Access articles. Where the Submitting Author wishes to make the Work available on an Open Access basis (and intends to pay the relevant APC), the terms of reuse of such Open Access shall be governed by a Creative Commons licence – details of these licences and which [Creative Commons](#) licence will apply to this Work are set out in our licence referred to above.

Other than as permitted in any relevant BMJ Author's Self Archiving Policies, I confirm this Work has not been accepted for publication elsewhere, is not being considered for publication elsewhere and does not duplicate material already published. I confirm all authors consent to publication of this Work and authorise the granting of this licence.

## Impact of an outreach program for patients with COVID-19 in an integrated healthcare delivery system

Running title: *Outreach program during COVID-19 pandemic*

Laura C. Myers, MD, MPH<sup>1,2</sup>, Brian L. Lawson, PhD<sup>1</sup>, Gabriel J. Escobar, MD<sup>1,2</sup>, Kathleen A. Daly, BS<sup>1,2</sup>, Yi-Fen Chen, MD<sup>2</sup>, Richard Dlott, MD<sup>2</sup>, Catherine Lee, PhD<sup>1</sup>, Vincent X. Liu, MD, MS<sup>1,2</sup>

1. Division of Research, Kaiser Permanente Northern California, Oakland CA
2. The Permanente Medical Group, Kaiser Permanente Northern California, Oakland CA

*Corresponding Author:*

Laura C. Myers MD MPH

Kaiser Permanente Northern California

Division of Research

2000 Broadway

Oakland, CA 94612

Email: [Laura.c.myers@kp.org](mailto:Laura.c.myers@kp.org) ORCID: 0000-0002-2872-3388

Twitter handle: @MDqualitysafety Telephone: (925) 433-3491

**Key words:** COVID-19, outreach program

**Word Count:**

Abstract: 298

Main: 2,854

**Conflicts of Interest/Disclosures, Funding:** The authors report no conflicts of interest. The work is not under consideration elsewhere for publication. Dr. Escobar had full access to the data. This work was supported by The Permanente Medical Group, Inc., and Kaiser Foundation Hospitals, Inc. Dr. Vincent Liu was also supported by NIH grant R35GM128672.

## ABSTRACT

**Objectives:** In the first year of the coronavirus disease 2019 (COVID-19) pandemic, health systems implemented programs to manage outpatients with COVID-19. The goal was to expedite patients' referral to acute care and prevent overcrowding of medical centers. We sought to evaluate the impact of such a program, the COVID-19 Home Care Team (CHCT) program.

**Design:** Retrospective cohort

**Setting:** Kaiser Permanente Northern California

**Participants:** Adult members before COVID-19 vaccine availability (2/1/2020-1/31/2021) with positive SARS-CoV-2 tests

**Intervention:** Virtual program to track and treat patients with COVID-19 "CHCT program."

**Outcomes:** Outcomes were 1) COVID-19-related emergency department visit, 2) COVID-19-related hospitalization, 3) inpatient mortality or 30-day hospice referral.

**Measures** We estimated the average effect comparing patients who were and were not treated by CHCT. We estimated propensity scores using an ensemble super learner (random forest, XGBoost, Generalized Additive Model and Multivariate Adaptive Regression Splines) and augmented inverse probability weighting.

**Results:** There were 98,585 patients with COVID-19. The majority were followed by CHCT (n=80,067, 81.2%). Patients followed by CHCT were older (mean age 43.9 vs 41.6 years,  $P<0.001$ ) and more comorbid with COPS2 score  $\geq 65$  (1.7% vs 1.1%,  $P<0.001$ ). Unadjusted analyses showed more COVID-19-related emergency department visits (9.5% vs 8.5%,  $P<0.001$ ) and hospitalizations (3.9% vs 3.2%,

1  
2  
3 P<0.001) in patients followed by CHCT but lower inpatient death or 30-day hospice  
4 referral (0.3% vs 0.5%, P<0.001). After weighting, there were higher rates of COVID-19-  
5 related emergency department visits (estimated intervention effect -0.8%, 95% CI -  
6 1.4%, -0.3%) and hospitalization (-0.5%, 95% CI -0.9%, -0.1%) but lower inpatient  
7 mortality or 30-day hospice referral (-0.5%, 95% CI -0.7%, -0.3%) in patients followed  
8 by CHCT.  
9  
10  
11  
12  
13  
14  
15

16  
17 **Conclusions:** Despite CHCT following older patients with higher comorbidity burden,  
18 there appeared to be a protective effect. Patients followed by CHCT were more likely to  
19 present to acute care and less likely to die inpatient.  
20  
21  
22  
23  
24  
25  
26  
27  
28  
29  
30  
31  
32  
33  
34  
35  
36  
37  
38  
39  
40  
41  
42  
43  
44  
45  
46  
47  
48  
49  
50  
51  
52  
53  
54  
55  
56  
57  
58  
59  
60

### Strengths and limitations of this study

- This is a retrospective cohort study that evaluated a real-world program “the COVID-19 Home Care Team program” in an integrated health system. The program reached a large population of diverse patients. While the program was not randomized, we capitalized on a natural control group when demand for the program (case incidence) went above capacity.
- We ensured that patients included in the control group would have been eligible for the intervention had it been available and carefully defined the time period to be prior to vaccine availability.
- We used robust methods to conduct the analysis (propensity scores with ensemble super learner and augmented inverse probability weighting).
- We found a protective effect of the program despite the program following older and more comorbid patients. This program is scalable, successfully offloaded burden from primary care physicians and could be done in other populations for future waves of the pandemic or other respiratory pandemics.
- We were unable to assess patient or provider satisfaction or provider burnout.

## INTRODUCTION

The coronavirus disease 2019 (COVID-19) pandemic posed many operational challenges for health systems. During each pandemic wave, bed demand exceeded supply, causing strain within the system to accommodate the influx of patients.<sup>1</sup> Units had to adapt to treat patients with acute respiratory failure outside of the intensive care unit, non-urgent outpatient procedures were delayed, and providers were needed to work additional shifts.<sup>2,3</sup> Several studies have documented higher inpatient mortality during inpatient surge periods.<sup>4-7</sup>

Considerable attention has been given to outcomes of patients hospitalized with COVID-19.<sup>6,8-12</sup> However, limited attention has been given to outpatient care of patients with COVID-19, including managing increased volume of secure messages and clinic visits and developing guidelines for triage to the acute care setting. Integrated health systems have the unique capability of managing patients across inpatient and outpatient settings, providing opportunities to intervene prior to their reaching the acute care setting and expediting their arrival to the acute care setting when necessary. Providing care upstream can reduce emergency department overcrowding by managing patients at home or by outpatient-only touchpoints. Additionally, referring patients early to acute care centers that have capacity, even if physically located further away, prevents overcrowding and actually expedites care. Also, having a handle on the number of referrals made to the emergency department allows providers to call in more staff to assist in triaging and managing patients in a timely way.

In the first year of the pandemic, Kaiser Permanente Northern California (KPNC) repurposed resources to accommodate the increased demands on the healthcare



1  
2  
3 system to support primary care physicians, manage patients with COVID-19 in the  
4 outpatient setting as much as possible and then expedite their referral to an acute care  
5 center that was not overcrowded. The novel intervention was COVID-19 Home Care  
6 Team (CHCT), which provided a coordinated system to track and treat outpatients who  
7 developed COVID-19. We sought to evaluate the impact of the CHCT program on risk  
8 of hospitalization and death.  
9  
10  
11  
12  
13  
14  
15  
16  
17  
18

## 19 **METHODS**

20  
21 This is a retrospective cohort study. The work was approved, and informed  
22 consent was waived by the Kaiser Permanente Northern California Institutional Review  
23 Board (#1634347).  
24  
25  
26  
27  
28  
29

### 30 **Setting**

31  
32 Under a mutual exclusivity agreement, 9,500 physicians of The Permanente  
33 Medical Group care for >4.4 million Kaiser Foundation Health Plan members at 21  
34 hospital facilities owned by Kaiser Foundation Hospitals.  
35  
36  
37  
38  
39  
40  
41

### 42 **Study Population**

43  
44 To establish our base population, we identified all records of members who were  
45  $\geq 18$  years old as of 2/1/2020 who had a positive SARS-CoV-2 polymerase chain  
46 reaction test ordered between 2/1/2020-1/31/2021. Prior to 3/13/2020, SARS-CoV-2  
47 tests were performed by the Centers for Disease Control and Prevention and  
48 state/county health departments, but the results were uploaded into our electronic  
49  
50  
51  
52  
53  
54  
55  
56  
57  
58  
59  
60

1  
2  
3 health record system and available in KPNC databases. If a patient had multiple  
4  
5 positive tests, we examined characteristics and outcomes of the first positive test. The  
6  
7 study end date was chosen because it was prior to widespread dissemination of  
8  
9 vaccinations for SARS-CoV-2. We excluded patients who were not eligible for CHCT  
10  
11 service, such as those who had first positive test during or after a COVID-19-related  
12  
13 emergency department visit or hospitalization. We also excluded patients who were  
14  
15 hospitalized within 48 hours of their positive test, because contact with the CHCT team  
16  
17 took up to 48 hours to initiate.  
18  
19  
20  
21  
22  
23

## 24 **Variable Extraction**

25  
26 We examined patients' electronic health records for demographic and clinical  
27  
28 variables, including the following data elements: self-reported race and ethnicity (in  
29  
30 order to show the delivery of CHCT across a population),<sup>13</sup> individual comorbid  
31  
32 conditions based on diagnosis codes, and neighborhood deprivation index, a composite  
33  
34 index ranging from -5 to 5 with more positive values reflecting lower socioeconomic  
35  
36 status.<sup>14</sup> We also captured 2 composite indices that are assigned to adults in the KPNC  
37  
38 system: a longitudinal comorbidity score (COMorbidity Point Score, version 2 [COPS2])  
39  
40 and an outpatient physiology-based severity of illness score (abbreviated Laboratory-  
41  
42 based Acute Physiology Score [abLAPS]). Each month, all adults with a KPNC medical  
43  
44 record number are assigned COPS2, which is based on diagnoses accrued in the  
45  
46 preceding 12 months with higher scores associated with increasing mortality risk.<sup>15</sup>  
47  
48 They are also assigned a monthly abLAPS score, which is based on 14 laboratory tests  
49  
50 obtained in the preceding month; higher scores are associated with increased  
51  
52  
53  
54  
55  
56  
57  
58  
59  
60

1  
2  
3 physiologic derangement.<sup>13,16</sup> These variables are more fully described in published  
4  
5 studies.<sup>15,17-19</sup>  
6  
7  
8  
9

## 10 **Exposure**

11  
12 Prior to the pandemic, KPNC had several existing population health programs for  
13 non-pregnant adults with chronic conditions (e.g., diabetes,<sup>20-22</sup> cancer screening,<sup>23,24</sup>  
14 cardiovascular disease<sup>25</sup>). In addition, a variety of follow-up processes existed to  
15 support primary care providers, such as combinations of in-person and automated  
16 outreach for management of hypertensive patients.<sup>26,27</sup> At the start of the pandemic,  
17 KPNC leadership utilized this population health management infrastructure to develop a  
18 novel outpatient population health program, CHCT, with the goal of increasing frontline  
19 primary care provider support by re-purposing non-physician staff, including nurses and  
20 nurse practitioners, as well as physicians from departments outside Adult and Family  
21 Medicine. After the State of California issued a Shelter in Place order in March 2020,  
22 non-emergent surgeries, procedures (e.g., routine cervical cancer screening,  
23 colonoscopies), and routine specialty follow-up appointments were deprioritized. KPNC  
24 was thus able to repurpose ~450 non-AFM physicians from over 20 specialties as well  
25 as non-physician staff to assist in assessing and caring for COVID-19 patients using  
26 standardized protocols which provided recommendations for when to triage patients to a  
27 higher level of care. All CHCT staff underwent formal training by the medical director  
28 (RD). CHCT provided individualized follow-up of patients with early COVID-19 infection  
29 including education, assessment, and, if indicated, explicit directions for how to access  
30 emergency department care.  
31  
32  
33  
34  
35  
36  
37  
38  
39  
40  
41  
42  
43  
44  
45  
46  
47  
48  
49  
50  
51  
52  
53  
54  
55  
56  
57  
58  
59  
60

1  
2  
3 Starting in March 2020, patients were electronically enrolled in CHCT when they  
4 developed a positive SARS-CoV-2 test. Program staff attempted to reach patients by  
5 phone soon after they were informed of their positive test result (usually within 24 hours  
6 after a positive result, including weekends). The electronic medical record integrated  
7 population care platform allowed CHCT to document outreach attempts so that multiple  
8 outreach attempts could be made. Patients active on KPNC's web portal were sent an  
9 automated personal message with links to information about available resources and  
10 advice on managing their symptoms. Based on standardized protocols developed by  
11 front line physicians, patients were escalated to video visits, in-person outpatient visits  
12 or acute care (emergency department). During COVID-19 surges, the number of  
13 patients with positive tests exceeded CHCT bandwidth, which provided a natural control  
14 group of patients who were not followed by CHCT that could be used to compare  
15 outcomes. Those who were attempted to be reached at least once were included in the  
16 intervention group.

## 37 Outcome

38 The primary outcome was COVID-19-related acute care utilization. We examined  
39 1) COVID-19-related emergency department visit or 2) COVID-19-related hospitalization  
40 within 2 weeks of positive test. Attribution of hospitalizations to COVID-19 was based on  
41 *International Classification of Diseases, Version 10* codes, timing of test orders and  
42 non-elective status using a previously published algorithm.<sup>19,28</sup> As a secondary  
43 outcome, we also examined the composite outcome of inpatient mortality or hospice  
44 referral within 30 days after a positive test as we and others have done in the past.<sup>6,13</sup>

## Statistical Analysis

We report mean with standard deviation or median with interquartile range for continuous variables. We report number with percent for categorical variables. We compare univariate values with T tests, Wilcoxon rank sum tests or Chi Squared tests, as appropriate.

For each outcome, we estimated the average treatment effect of the CHCT program, comparing patients who were enrolled in CHCT to those who were not using an augmented inverse probability weighting (AIPW)<sup>29</sup> estimator. In AIPW, models are developed for the propensity of treatment and outcome probability as a function of covariates, utilizing all available data. AIPW has the appealing property that only one of the models needs to be specified correctly, known as “doubly robust.” We implemented the approach using the AIPW R package<sup>31</sup> that employs the ensemble machine learning approach Super Learner (random forest, XGBoost, Generalized Additive Model and Multivariate Adaptive Regression Splines) to estimate the probability models. The following variables were used in both the propensity score and outcome probability models: age, sex, neighborhood deprivation index, abLAPS, COPS2, obesity, diabetes, hypertension and month of the pandemic. These three comorbidities were chosen because they are highly prevalent in patients with COVID-19 and impact mortality.<sup>30</sup> Month of the pandemic was included because outcomes of patients have improved over time.<sup>6,11,31</sup> We reported the standardized between-group differences in covariates before and after inverse probability weighting based on the propensity score. We also reported the AIPW adjusted outcome prevalence depending on whether patients were followed

1  
2  
3 by CHCT or not and the estimated intervention effect with 95% confidence interval,  
4  
5 which is the average treatment effect.<sup>32</sup> Threshold for significance was <0.05.  
6  
7

## 8 9 10 **RESULTS**

11  
12 There were 98,585 patients with positive tests, the majority of whom were  
13 followed by CHCT (n=80,067, 81.2%). Very few patients (n=18) died in the 4 weeks  
14 after a positive test without hospitalization, and there was no difference in the  
15 percentage who died depending on whether they were followed by CHCT (n=16, 5.1%)  
16 or not (n=2, 4.9%, P=0.40). Patients followed by CHCT were older (mean age 43.9  
17 compared to 41.6 years, P<0.001) and more comorbid with COPS2 score  $\geq 65$  (1.7% vs  
18 1.1%, P<0.001, **Table 1**). They were less likely to be male (45.0% vs 49.3%, P<0.001).  
19 Patients studied were diverse with 14.0% Asian, 43.7% Hispanic and 5.8% Black. They  
20 were also more likely to have diabetes (11.4% vs 5.7%, P<0.001), obesity (7.6% vs  
21 4.8%, P<0.001) and hypertension (13.7% vs 8.4%, P<0.001). The majority of patients  
22 (n=69,150, 70.1%) had positive tests during the third wave of the pandemic (10/15/20-  
23 1/31/21).  
24  
25  
26  
27  
28  
29  
30  
31  
32  
33  
34  
35  
36  
37  
38  
39

40 The overall raw outcome rates were the following: 9.3% had COVID-19-related  
41 emergency department visits, 3.8% had COVID-19-related hospitalizations and 0.4%  
42 had inpatient death or 30-day hospice referral (**Table 1**). There were more COVID-19-  
43 related emergency department visits (9.5% vs 8.5%, P<0.001) and hospitalizations  
44 (3.9% vs 3.2%, P<0.001) in patients followed by CHCT but lower inpatient death or 30-  
45 day hospice referral (0.3% vs 0.5%, P<0.001).  
46  
47  
48  
49  
50  
51  
52  
53  
54  
55  
56  
57  
58  
59  
60

1  
2  
3 **Table 2** shows the standardized differences in characteristics between patients  
4 followed by CHCT and not followed by CHCT. After inverse probability weighting, there  
5 were no significant differences in standardized differences of characteristics, as  
6 expected. After AIPW, there appeared to be a protective effect from the program. There  
7 were higher rates of COVID-19-related emergency department visits (estimated  
8 intervention effect -0.8%, 95% CI -1.4%, -0.3%) and hospitalizations (-0.5%, 95% CI  
9 -0.9%, -0.1%, **Table 3**) and lower inpatient mortality or 30-day hospice referral (-0.5%,  
10 95% CI -0.7%, -0.3%).  
11  
12  
13  
14  
15  
16  
17  
18  
19  
20

21 The volume of COVID-19-related outpatient visits increased dramatically during  
22 the 3 waves of the pandemic. The majority was conducted by CHCT providers (dark  
23 portion of stacked bar chart, **Figure 1**), demonstrating an offloading of outpatient work  
24 to CHCT providers.  
25  
26  
27  
28  
29  
30

## 31 **DISCUSSION**

32  
33 Using population-level data from an integrated health system and robust  
34 methods (AIPW), we found a protective effect of an outpatient management program for  
35 COVID-19 which was implemented very early in the pandemic to manage patients at  
36 home and expedite their referral to acute care when needed. Patients followed by  
37 CHCT were older and had higher comorbidity burden, which argues against the  
38 possibility of cherry picking. We interpret the results to mean that patients followed by  
39 CHCT were more likely to be referred to acute care because of proactive outpatient  
40 outreach and monitoring, which likely explains the lower inpatient mortality or 30-day  
41 referral to hospice. We showed that there were drastic increases in the volume of  
42  
43  
44  
45  
46  
47  
48  
49  
50  
51  
52  
53  
54  
55  
56  
57  
58  
59  
60

1  
2  
3 COVID-19-related outpatient visits during the 3 surge periods and that much of the  
4  
5 outpatient COVID-19-related visits were conducted by CHCT providers, demonstrating  
6  
7 an offloading of outpatient burden by the program. We believe these findings are  
8  
9 important to disseminate as other health systems struggle to manage entire populations  
10  
11 of patients through the waves of the current pandemic. The program is scalable and  
12  
13 generalizable, as the program itself is delivered completely virtually.  
14  
15

16  
17 Strain is a term that refers to the time when a clinical care team's ability to  
18  
19 provide high quality care is exceeded due to high occupancy, acuity, or turnover. During  
20  
21 the pandemic, the Centers for Disease Control and Prevention estimated that if the  
22  
23 critical care bed capacity reached 75% nationwide, 12,000 (95% CI=8,623–17,294)  
24  
25 excess deaths would occur nationally 2 weeks later.<sup>7</sup> Preventing emergency room  
26  
27 overcrowding due to unnecessary visits during periods of high transmission was critical  
28  
29 to prevent strain-related deaths.<sup>7,34-36</sup> Programs such as CHCT attempted to streamline  
30  
31 the management of patients with COVID-19 in the outpatient setting and to facilitate  
32  
33 appropriate emergency room care when patients demonstrate the need for acute care.  
34  
35  
36

37  
38 It is important to evaluate real-world programs, such as CHCT, that can impact  
39  
40 outcomes for a population of patients. Patients with early COVID-19 had tremendous  
41  
42 need for both outpatient and inpatient care. One analysis reported patients required 5.6-  
43  
44 9 visits in the 30 days after the diagnosis depending on whether they ultimately were  
45  
46 hospitalized.<sup>37</sup> Given the rapidity of the onset of the pandemic, this demand for  
47  
48 healthcare resources strained our healthcare system. We showed that the majority of  
49  
50 COVID-19-related outpatient visits were managed by CHCT providers, repurposed from  
51  
52 specialties who had capacity at certain points during the pandemic. Additionally, the  
53  
54  
55  
56  
57  
58  
59  
60



1  
2  
3 majority of CHCT encounters were via telephone, which required fewer resources than  
4  
5 video or in-person visits. In this study, we demonstrated the management of large  
6  
7 demand upswings due to deployment and redeployment of resources which had a  
8  
9 positive impact on patient care.  
10

11  
12 Other programs like CHCT have been implemented and described in the  
13  
14 literature. The direction of our results (favoring program benefit) is consistent with the  
15  
16 other 3 programs described herein, but the details of the program and outcomes  
17  
18 measured differed. First, the Cleveland Clinic Home Monitoring Program included  
19  
20 telephone outreach to 3,975 patients after a positive SARS-CoV-2 test to assess  
21  
22 patients' symptoms and escalate their care.<sup>38</sup> They performed a matched propensity  
23  
24 score analysis and found lower odds of 30-day and 90-day outpatient visits and  
25  
26 hospitalization, but not emergency department visits. In our study, which evaluated a  
27  
28 program implemented at scale, we report more acute care hospitalization and improved  
29  
30 clinical outcomes. Second, the University of Pennsylvania COVID Watch program was a  
31  
32 texting intervention whereby 3,488 patients received twice daily texts to inquire about  
33  
34 symptoms.<sup>39</sup> They performed a propensity score analysis and found a 64% relative  
35  
36 reduction in death for enrolled patients. They found patients were reporting to the  
37  
38 emergency department sooner and had more frequent telemedicine encounters. Our  
39  
40 program was implemented on a larger scale but found similar reduction in inpatient  
41  
42 mortality. Third, the Home Monitoring Program at Providence health system delivered  
43  
44 pulse oximeters and thermometers to the home and administered surveys in  
45  
46 English/Spanish to monitor symptoms over time.<sup>40</sup> The authors performed propensity  
47  
48 scores with inverse probability of treatment weighting. Of 4,358 participants, the  
49  
50  
51  
52  
53  
54  
55  
56  
57  
58  
59  
60

1  
2  
3 program was associated with more outpatient and emergency department encounters  
4  
5 and resulted in high enrollee satisfaction. This study did not report hospitalization rates  
6  
7 or rates of clinical outcomes, such as death.<sup>40</sup>  
8  
9

10 There are several limitations to the current analysis. We did not measure  
11  
12 physician or patient satisfaction/experience related to the program. We also did not  
13  
14 measure provider burnout created or alleviated by the program. In an effort to reach as  
15  
16 many people as possible, the intervention was not randomized but we used the natural  
17  
18 control group formed when program demand exceeded bandwidth.  
19  
20

21 There are several key takeaways and advantages to our study. We showed that  
22  
23 patients followed by CHCT were older, more comorbid and from diverse racial  
24  
25 backgrounds. While being older and more comorbid could have disfavored the program,  
26  
27 we found higher rates of acute care utilization even after adjusting for confounding and  
28  
29 lower inpatient mortality or 30-day hospice referral. Additionally, we examined patients  
30  
31 who had had at least 1 outreach by CHCT into the intervention group to make it harder  
32  
33 to find a statistically significant difference between the groups. We ensured that patients  
34  
35 included in the analysis were eligible for CHCT services, i.e., they were not hospitalized  
36  
37 at the time of receiving a positive test or within 48 hours because it took CHCT 48 hours  
38  
39 to initiate contact. We appropriately examined the period of the pandemic prior to  
40  
41 widespread vaccination; including the post-vaccination period would complicate the  
42  
43 interpretation of the result given that unvaccinated patients are more likely to be  
44  
45 hospitalized for COVID-19 and may be less likely to engage with the program.<sup>33,41</sup> We  
46  
47 also demonstrated that the number of patients who died in the 4 weeks after a positive  
48  
49 test were few and not different between whether they were followed by CHCT or not.  
50  
51  
52  
53  
54  
55  
56  
57  
58  
59  
60

1  
2  
3 We performed a robust analysis using AIPW and adjustment for confounding, including  
4 month of the pandemic,<sup>35</sup> and capitalized on the natural control group that occurred  
5  
6 when program demand exceeded bandwidth.  
7  
8  
9

10 In conclusion, we evaluated the KPNC CHCT program, which was developed  
11 and implemented early in the pandemic and at scale to manage rises in outpatient care  
12 needs related to COVID-19 surges. Despite CHCT following older patients with higher  
13 comorbidity burden, there appeared to be a protective effect with higher likelihood of  
14 presenting to acute care but lower likelihood of inpatient mortality. We found the  
15 program was successful in offloading outpatient clinical care onto repurposed providers  
16 during the early part of the pandemic. This type of program is scalable for future waves  
17 of the COVID-19 pandemic or future pandemics.  
18  
19  
20  
21  
22  
23  
24  
25  
26  
27  
28  
29  
30  
31  
32  
33  
34  
35  
36  
37  
38  
39  
40  
41  
42  
43  
44  
45  
46  
47  
48  
49  
50  
51  
52  
53  
54  
55  
56  
57  
58  
59  
60

## ACKNOWLEDGMENTS

We wish to thank the Kaiser Permanente Division of Research Strategic Programming Group for formatting the dataset and The Permanente Medical Group Consulting Services for consulting on data extraction and analysis.

## AUTHOR'S CONTRIBUTIONS

LCM is the corresponding author and guarantor for the study. LCM, BLL, GJE, RD, CL, and VXL conceptualized the project. LCM, GJE, VXL, BLL, CL contributed to the data curation, formal analysis, and methodology. LCM wrote the first draft of the manuscript, with subsequent editing done by listed co-authors; following this, LCM prepared the final version which is submitted here.

## DATA SHARING STATEMENT

### DATASETS NOT PUBLICLY AVAILABLE

The datasets generated and/or analyzed during the current study are not publicly available due to their being the property of Kaiser Foundation Health Plan, Inc., but are available to interested collaborators in the context of a formal collaboration approved by the Kaiser Permanente Northern California Institutional Review Board for the Protection of Human Subjects.

1  
2  
3 **Figure 1: Offloading of outpatient COVID-19 related visits to CHCT providers**  
4  
5

6  
7 Figure 1 Legend

8  
9 The figure shows the number of COVID-19-related outpatient encounters per week  
10  
11 depending on whether providers were part of COVID-19 Home Care Team (dark grey)  
12  
13 or not (light grey). The bars shown are stacked.  
14  
15  
16  
17  
18  
19  
20  
21  
22  
23  
24  
25  
26  
27  
28  
29  
30  
31  
32  
33  
34  
35  
36  
37  
38  
39  
40  
41  
42  
43  
44  
45  
46  
47  
48  
49  
50  
51  
52  
53  
54  
55  
56  
57  
58  
59  
60

## REFERENCES

1. Myers LC, Liu VX. The COVID-19 Pandemic Strikes Again and Again and Again. *JAMA Netw Open*. Mar 1 2022;5(3):e221760. doi:10.1001/jamanetworkopen.2022.1760
2. Parodi SM, Liu VX. From Containment to Mitigation of COVID-19 in the US. *JAMA*. Apr 21 2020;323(15):1441-1442. doi:10.1001/jama.2020.3882
3. Rouillard S, Liu VX, Corley DA. COVID-19 and long-term planning for procedure-based specialties during extended mitigation and suppression strategies. *Gastroenterology*. Jan 2021;160(1):4-9. doi:10.1053/j.gastro.2020.05.047
4. Dang A, Thakker R, Li S, Hommel E, Mehta HB, Goodwin JS. Hospitalizations and Mortality From Non-SARS-CoV-2 Causes Among Medicare Beneficiaries at US Hospitals During the SARS-CoV-2 Pandemic. *JAMA Netw Open*. Mar 1 2022;5(3):e221754. doi:10.1001/jamanetworkopen.2022.1754
5. Kadri SS, Sun J, Lawandi A, et al. Association Between Caseload Surge and COVID-19 Survival in 558 U.S. Hospitals, March to August 2020. *Ann Intern Med*. Sep 2021;174(9):1240-1251. doi:10.7326/M21-1213
6. Asch DA, Sheils NE, Islam MN, et al. Variation in US Hospital Mortality Rates for Patients Admitted With COVID-19 During the First 6 Months of the Pandemic. *JAMA Intern Med*. Apr 1 2021;181(4):471-478. doi:10.1001/jamainternmed.2020.8193
7. French G, Hulse M, Nguyen D, et al. Impact of Hospital Strain on Excess Deaths During the COVID-19 Pandemic - United States, July 2020-July 2021. *MMWR Morb Mortal Wkly Rep*. Nov 19 2021;70(46):1613-1616. doi:10.15585/mmwr.mm7046a5
8. Jeganathan N, Grewal S, Sathananthan M. Comparison of Deaths from COVID-19 and Seasonal Influenza in the USA. *Lung*. Oct 2021;199(5):559-561. doi:10.1007/s00408-021-00468-0
9. Piroth L, Cottinet J, Mariet AS, et al. Comparison of the characteristics, morbidity, and mortality of COVID-19 and seasonal influenza: a nationwide, population-based retrospective cohort study. *Lancet Respir Med*. Mar 2021;9(3):251-259. doi:10.1016/S2213-2600(20)30527-0
10. Horwitz LI, Jones SA, Cerfolio RJ, et al. Trends in COVID-19 Risk-Adjusted Mortality Rates. *J Hosp Med*. Oct 21 2020;doi:10.12788/jhm.3552
11. Anesi GL, Jablonski J, Harhay MO, et al. Characteristics, outcomes, and trends of patients with COVID-19-related critical illness at a learning health system in the United States. *Ann Intern Med*. Jan 19 2021;doi:10.7326/M20-5327
12. Myers LC, Parodi SM, Escobar GJ, Liu VX. Characteristics of hospitalized adults with COVID-19 in an integrated health care system in California. *JAMA*. Jun 2 2020;323(21):2195-2198. doi:10.1001/jama.2020.7202
13. Escobar GJ AA, Liu VX, Soltesz L, Chen YI, Parodi SM, Ray GT, Myers LC, Ramaprasad CM, Dlott R, Lee C. Racial Disparities in COVID-19 Testing and Outcomes : Retrospective Cohort Study in an Integrated Health System. *Annals of Internal Medicine*. 2020;174(6):786-793. doi:10.7326/M20-6979
14. Messer LC, Laraia BA, Kaufman JS, et al. The development of a standardized neighborhood deprivation index. *J Urban Health*. Nov 2006;83(6):1041-62. doi:10.1007/s11524-006-9094-x
15. Escobar GJ, Gardner MN, Greene JD, Draper D, Kipnis P. Risk-adjusting hospital mortality using a comprehensive electronic record in an integrated health care delivery system. *Med Care*. May 2013;51(5):446-53. doi:10.1097/MLR.0b013e3182881c8e
16. Escobar GJ, Greene JD, Scheirer P, Gardner MN, Draper D, Kipnis P. Risk-adjusting hospital inpatient mortality using automated inpatient, outpatient, and laboratory databases. *Med Care*. Mar 2008;46(3):232-9. doi:10.1097/MLR.0b013e3181589bb6

17. Escobar G, Greene J, Scheirer P, Gardner M, Draper D, Kipnis P. Risk Adjusting Hospital Inpatient Mortality Using Automated Inpatient, Outpatient, and Laboratory Databases. *Medical Care*. March 2008;46(3):232-39.
18. Escobar GJ, Ragins A, Scheirer P, Liu V, Robles J, Kipnis P. Nonelective Rehospitalizations and Postdischarge Mortality: Predictive Models Suitable for Use in Real Time. *Medical care*. Nov 2015;53(11):916-23. doi:10.1097/MLR.0000000000000435
19. Escobar GJ, Adams AS, Liu VX, et al. Racial Disparities in COVID-19 Testing and Outcomes : Retrospective Cohort Study in an Integrated Health System. *Ann Intern Med*. Feb 9 2021;doi:10.7326/M20-6979
20. Sadur CN, Moline N, Costa M, et al. Diabetes management in a health maintenance organization. Efficacy of care management using cluster visits. *Diabetes Care*. Dec 1999;22(12):2011-7. doi:10.2337/diacare.22.12.2011
21. Schmittiel JA, Uratsu CS, Fireman BH, Selby JV. The effectiveness of diabetes care management in managed care. *Am J Manag Care*. May 2009;15(5):295-301.
22. Rana JS, Karter AJ, Liu JY, Moffet HH, Jaffe MG. Improved Cardiovascular Risk Factors Control Associated with a Large-Scale Population Management Program Among Diabetes Patients. *Am J Med*. Jun 2018;131(6):661-668. doi:10.1016/j.amjmed.2018.01.024
23. Doubeni CA, Corley DA, Zhao W, Lau Y, Jensen CD, Levin TR. Association between Improved Colorectal Screening and Racial Disparities. *N Engl J Med*. Feb 24 2022;386(8):796-798. doi:10.1056/NEJMc2112409
24. Mehta SJ, Jensen CD, Quinn VP, et al. Race/Ethnicity and Adoption of a Population Health Management Approach to Colorectal Cancer Screening in a Community-Based Healthcare System. *J Gen Intern Med*. Nov 2016;31(11):1323-1330. doi:10.1007/s11606-016-3792-1
25. Rana JS, Karter AJ, Liu JY, Moffet HH, Jaffe MG. Improved Cardiovascular Risk Factors Control Associated with a Large-Scale Population Management Program Among Diabetes Patients. *The American Journal of Medicine*. 2018;131(6):661-668. doi:10.1016/j.amjmed.2018.01.024
26. Jaffe MG, Lee GA, Young JD, Sidney S, Go AS. Improved blood pressure control associated with a large-scale hypertension program. *JAMA*. Aug 21 2013;310(7):699-705. doi:10.1001/jama.2013.108769
27. Jaffe MG, Young JD. The Kaiser Permanente Northern California Story: Improving Hypertension Control From 44% to 90% in 13 Years (2000 to 2013). *J Clin Hypertens (Greenwich)*. Apr 2016;18(4):260-1. doi:10.1111/jch.12803
28. Myers LC, Ng K, Plimier C, Daly KA, Kipnis P, Liu VX. Trends in Outpatient Visits and Hospital and Intensive Care Unit Admissions of Adults With COVID-19 in an Integrated US Health Care System, March 2020 to January 2022. *JAMA Netw Open*. Jan 3 2023;6(1):e2253269. doi:10.1001/jamanetworkopen.2022.53269
29. Kurz CF. Augmented Inverse Probability Weighting and the Double Robustness Property. *Med Decis Making*. Feb 2022;42(2):156-167. doi:10.1177/0272989X211027181
30. Ko JY, Danielson ML, Town M, et al. Risk Factors for Coronavirus Disease 2019 (COVID-19)-Associated Hospitalization: COVID-19-Associated Hospitalization Surveillance Network and Behavioral Risk Factor Surveillance System. *Clin Infect Dis*. Jun 1 2021;72(11):e695-e703. doi:10.1093/cid/ciaa1419
31. Horby P, Lim WS, Emberson JR, et al. Dexamethasone in hospitalized patients with COVID-19. *N Engl J Med*. Feb 25 2021;384(8):693-704. doi:10.1056/NEJMoa2021436
32. Zhong Y, Kennedy EH, Bodnar LM, Naimi AI. AIPW: An R Package for Augmented Inverse Probability-Weighted Estimation of Average Causal Effects. *Am J Epidemiol*. Dec 1 2021;190(12):2690-2699. doi:10.1093/aje/kwab207

- 1  
2  
3 33. Myers LC, Kipnis P, Greene J, et al. Adults hospitalized with breakthrough COVID-19  
4 have lower mortality than matched unvaccinated adults. *J Intern Med*. May 9  
5 2022;doi:10.1111/joim.13504  
6 34. Anesi GL, Chowdhury M, Small DS, et al. Association of a Novel Index of Hospital  
7 Capacity Strain with Admission to Intensive Care Units. *Ann Am Thorac Soc*. Nov  
8 2020;17(11):1440-1447. doi:10.1513/AnnalsATS.202003-228OC  
9 35. Anesi GL, Jablonski J, Harhay MO, et al. Characteristics, Outcomes, and Trends of  
10 Patients With COVID-19-Related Critical Illness at a Learning Health System in the United  
11 States. *Ann Intern Med*. May 2021;174(5):613-621. doi:10.7326/M20-5327  
12 36. Anesi GL, Liu VX, Gabler NB, et al. Associations of intensive care unit capacity strain  
13 with disposition and outcomes of patients with sepsis presenting to the emergency department.  
14 *Ann Am Thorac Soc*. Nov 2018;15(11):1328-1335. doi:10.1513/AnnalsATS.201804-241OC  
15 37. Huang BZ, Creekmur B, Yoo MS, Broder B, Subject C, Sharp AL. Healthcare Utilization  
16 Among Patients Diagnosed with COVID-19 in a Large Integrated Health System. *J Gen Intern  
17 Med*. Mar 2022;37(4):830-837. doi:10.1007/s11606-021-07139-z  
18 38. Misra-Hebert AD, Ji X, Jehi L, et al. COVID-19 Home Monitoring After Diagnosis and  
19 Health Care Utilization in an Integrated Health System. *JAMA Health Forum*.  
20 2021;2(5):e210333-e210333. doi:10.1001/jamahealthforum.2021.0333  
21 39. Delgado MK, Morgan AU, Asch DA, et al. Comparative Effectiveness of an Automated  
22 Text Messaging Service for Monitoring COVID-19 at Home. *Ann Intern Med*. Feb  
23 2022;175(2):179-190. doi:10.7326/M21-2019  
24 40. Vartanian KB, Holtorf M, Cox EJ, et al. Patient experience and healthcare utilization for a  
25 COVID-19 telemedicine home monitoring program offered in English and Spanish. *PLoS One*.  
26 2022;17(6):e0270754. doi:10.1371/journal.pone.0270754  
27 41. Kipnis P, Soltesz L, Escobar G, Myers L, VX L. Evaluation of Vaccination Strategies to  
28 Compare Efficient and Equitable Vaccine Allocation by Race and Ethnicity Across Time. *JAMA  
29 Health Forum*. 2021;(2(8)):e212095. doi:10.1001/jamahealthforum.2021.2095  
30  
31  
32  
33  
34  
35  
36  
37  
38  
39  
40  
41  
42  
43  
44  
45  
46  
47  
48  
49  
50  
51  
52  
53  
54  
55  
56  
57  
58  
59  
60



**Table 1: Characteristics of patients with COVID-19+ who were and were not followed by COVID-19 Home Care Team**

|                                                       | All patients<br>n=98,585 | Patients<br>followed by<br>CHCT<br>n=80,067 | Patients not<br>followed by<br>CHCT<br>n=18,518 | P value |
|-------------------------------------------------------|--------------------------|---------------------------------------------|-------------------------------------------------|---------|
| Age in years, mean (SD)                               | 43.47 (15.54)            | 43.90 (15.65)                               | 41.61 (14.91)                                   | <0.001  |
| Sex, male (%)                                         | 45,183 (45.8%)           | 36,052 (45.0%)                              | 9,131 (49.3%)                                   | <0.001  |
| Race, n (%)                                           |                          |                                             |                                                 |         |
| Asian                                                 | 13,796 (14.0%)           | 10,890 (13.6%)                              | 2,906 (15.7%)                                   | <0.001  |
| Black                                                 | 5,721 (5.8%)             | 4,541 (5.7%)                                | 1,180 (6.4%)                                    |         |
| Hispanic                                              | 43,082 (43.7%)           | 35,111 (43.9%)                              | 7,971 (43.0%)                                   |         |
| White                                                 | 27,646 (28.0%)           | 22,958 (28.7%)                              | 4,688 (25.3%)                                   |         |
| Other/unknown race <sup>a</sup>                       | 8,340 (8.5%)             | 6,567 (8.2%)                                | 1,773 (9.6%)                                    |         |
| NDI (median, Q1-Q3) <sup>b</sup>                      | -0.07<br>[-0.61, 0.64]   | -0.08<br>[-0.63, 0.64]                      | -0.03<br>[-0.53, 0.62]                          | <0.001  |
| COPS2 (median, Q1-Q3) <sup>c</sup>                    | 10.0<br>[10.0, 10.0]     | 10.0<br>[10.0, 10.0]                        | 10.0<br>[10.0, 10.0]                            | <0.001  |
| COPS2 ≥ 65, n (%)                                     | 1555 (1.6%)              | 1,350 (1.7%)                                | 205 (1.1%)                                      | <0.001  |
| Comorbidities                                         |                          |                                             |                                                 |         |
| Diabetes, n (%)                                       | 10,176 (10.3%)           | 9,122 (11.4%)                               | 1,054 (5.7%)                                    | <0.001  |
| Obesity, n (%)                                        | 6,988 (7.1%)             | 6,105 (7.6%)                                | 883 (4.8%)                                      | <0.001  |
| Hypertension, n (%)                                   | 12,505 (12.7%)           | 10,948 (13.7%)                              | 1,557 (8.4%)                                    | <0.001  |
| Chronic pulmonary disease, n (%)                      | 7,119 (7.2%)             | 6,142 (7.7%)                                | 977 (5.3%)                                      | <0.001  |
| Congestive heart failure, n (%)                       | 764 (0.8%)               | 665 (0.8%)                                  | 99 (0.5%)                                       | <0.001  |
| Cancer, n (%)                                         | 1,363 (1.4%)             | 1,173 (1.5%)                                | 190 (1.0%)                                      | <0.001  |
| abLAPS (median, Q1-Q3) <sup>d</sup>                   | 0.0 [0.0, 0.0]           | 0.0 [0.0, 0.0]                              | 0.0 [0.0, 0.0]                                  | <0.001  |
| abLAPS ≥ 4, n (%)                                     | 3,219 (3.3%)             | 2,753 (3.4%)                                | 466 (2.5%)                                      | <0.001  |
| Wave, n (%)                                           |                          |                                             |                                                 | <0.001  |
| 1 (2/1/20-5/31/20)                                    | 2,476 (2.5%)             | 1,978 (2.5%)                                | 498 (2.7%)                                      | <0.001  |
| 2 (6/1/20-10/14/20)                                   | 26,959 (27.3%)           | 21,580 (27.0%)                              | 5,379 (29.1%)                                   |         |
| 3 (10/15/20-1/31/21)                                  | 69,150 (70.1%)           | 56,509 (70.6%)                              | 12,641 (68.3%)                                  |         |
| COVID-19-related emergency<br>department visit, n (%) | 9,165 (9.3%)             | 7,587 (9.5%)                                | 1,578 (8.5%)                                    | <0.001  |
| COVID-19-related hospitalization, n (%)               | 3,703 (3.8%)             | 3,116 (3.9%)                                | 587 (3.2%)                                      | <0.001  |
| Inpatient death or 30-day hospice<br>referral, n (%)  | 365 (0.4%)               | 265 (0.3%)                                  | 100 (0.5%)                                      | <0.001  |

Abbreviations: CHCT=Coronavirus disease 19 Home Care Team

**FOOTNOTE**

a Other race includes: American Indian, Alaska Native, Asian Pacific, Native Hawaiian, Pacific Islander, multiracial.

b Neighborhood deprivation index ranges between -5 to +5 with more positive values indicating lower status. See text of Messer et al. (2006) for additional detail.

c The COMorbidity Point Score, version 2 (COPS2) described in Escobar et al. (2013) is a score assigned every month to all adults with a Kaiser Permanente Northern California medical record number. Range is from 0 to 1010; higher scores indicate worse mortality risk. The univariate relationship between the COPS2 and 1-year mortality is as follows: 0-39, 0.3%; 40-64, 5.3%; 65+, 17.2%.

d The Abbreviated Laboratory-based Acute Physiology Score (abLAPS) is a monthly score employing 14 laboratory tests based on the LAPS score described in Escobar et al. (2008). Range is from 0 to 256; higher scores indicate increasing physiologic abnormalities in the preceding month. The univariate relationship between the abLAPS and 30-day mortality is as follows: 0-4, 0.06%; 4-9, 0.18%; 10+, 1.32%.

**Table 2: Selected characteristics of patients who were and were not followed by COVID-19 Home Care Team before and after weighting**

|                                | Before Weighting                      |                                           |                         | After Weighting           |                               |                            |
|--------------------------------|---------------------------------------|-------------------------------------------|-------------------------|---------------------------|-------------------------------|----------------------------|
|                                | Patients followed by CHCT<br>n=80,067 | Patients not followed by CHCT<br>n=18,518 | Standardized Difference | Patients followed by CHCT | Patients not followed by CHCT | Standardized Difference, % |
| Age, median (IQR)              | 43 [31, 55]                           | 40 [30, 52]                               | 0.15                    | 42 [31, 55]               | 42 [31, 55]                   | 0.01                       |
| Sex, male (%)                  | 36,052 (45.0%)                        | 9,131 (49.3%)                             | -0.09                   | 44,889.3 (45.7)           | 42,202.6 (45.9)               | 0.00                       |
| NDI, median (IQR) <sup>1</sup> | 0.08 [-0.63, 0.64]                    | 0.03 [-0.53, 0.62]                        | -0.04                   | -0.07 [-0.61, 0.64]       | -0.08 [-0.63, 0.63]           | 0.01                       |
| AbLAPS, median (IQR)           | 0.00 [0.00, 0.00]                     | 0.00 [0.00, 0.00]                         | 0.05                    | 0.00 [0.00, 0.00]         | 0.00 [0.00, 0.00]             | 0.02                       |
| COPS2, median (IQR)            | 10.00 [10.00, 10.00]                  | 10.00 [10.00, 10.00]                      | 0.10                    | 10.00 [10.00, 10.00]      | 10.00 [10.00, 10.00]          | 0.04                       |
| Obesity, n (%)                 | 6,105 (7.6%)                          | 883 (4.8%)                                | 0.13                    | 6991.7 (7.1)              | 6,693.1 (7.3)                 | -0.01                      |
| Diabetes, n (%)                | 9,122 (11.4%)                         | 1,054 (5.7%)                              | 0.25                    | 10,172.2 (10.4)           | 9,822.9 (10.7)                | -0.01                      |
| Hypertension, n (%)            | 10,948 (13.7%)                        | 1,557 (8.4%)                              | 0.19                    | 12,520.3 (12.8)           | 12,463.6 (13.6)               | -0.02                      |
| March 2020, n (%)              | 388 (0%)                              | 112 (1%)                                  | -0.02                   | 498.3 (0.5)               | 549.7 (0.6)                   | -0.01                      |
| April 2020, n (%)              | 719 (1%)                              | 199 (1%)                                  | -0.02                   | 915.4 (0.9)               | 903.9 (1.0)                   | -0.01                      |
| May 2020, n (%)                | 871 (1%)                              | 187 (1%)                                  | 0.01                    | 1,061.3 (1.1)             | 1,011.3 (1.1)                 | 0.00                       |
| June 2020, n (%)               | 3,687 (5%)                            | 827 (4%)                                  | 0.01                    | 4,538.3 (4.6)             | 4,310.7 (4.7)                 | 0.00                       |
| July 2020, n (%)               | 8,316 (10%)                           | 2,277 (12%)                               | -0.06                   | 10,575.5 (10.8)           | 10,142.7 (11.0)               | -0.01                      |
| August 2020, n (%)             | 5,087 (6%)                            | 1,290 (7%)                                | -0.02                   | 6,348.4 (6.5)             | 5,979.4 (6.5)                 | 0.00                       |
| September 2020, n (%)          | 3,118 (4%)                            | 703 (4%)                                  | 0.01                    | 3,803.9 (3.9)             | 3,628.0 (3.9)                 | 0.00                       |
| October 2020, n (%)            | 3,611 (5%)                            | 676 (4%)                                  | 0.05                    | 4,293.8 (4.4)             | 4,243.5 (4.6)                 | -0.01                      |
| November 2020, n (%)           | 10,888 (14%)                          | 2,416 (13%)                               | 0.02                    | 13,227.8 (13.5)           | 12,639.9 (13.8)               | -0.01                      |
| December 2020, n (%)           | 26,592 (33%)                          | 6,059 (33%)                               | 0.01                    | 32,458.2 (33.1)           | 29,917.7 (32.6)               | 0.01                       |
| January 2021, n (%)            | 16,790 (21%)                          | 3,772 (20%)                               | 0.01                    | 20,416.6 (20.8)           | 18,567.2 (20.2)               | 0.01                       |

Abbreviations: NDI=neighborhood deprivation index, COPS2=Comorbidity Point Score, Version 2, abLAPS=Abbreviated Laboratory-based Acute Physiology Score

**Table 3: Estimated intervention effect of COVID-19 Home Care Team**

| Outcome                                     | Adjusted outcome prevalence |         | Estimated intervention effect<br>(95% Confidence Interval) |
|---------------------------------------------|-----------------------------|---------|------------------------------------------------------------|
|                                             | CHCT                        | No CHCT |                                                            |
| COVID-19-related emergency department visit | 9.3%                        | 10.1%   | -0.8% (-1.4%,-0.3%)                                        |
| COVID-19-related hospitalization            | 3.8%                        | 4.3%    | -0.5% (-0.9%,-0.1%)                                        |
| Inpatient death or 30-day hospice referral  | 0.3%                        | 0.8%    | -0.5% (-0.7%,-0.3%)                                        |

The intervention effect being negative indicates a protective effect of the intervention.

1  
2  
3  
4  
5  
6  
7  
8  
9  
10  
11  
12  
13  
14  
15  
16  
17  
18  
19  
20  
21  
22  
23  
24  
25  
26  
27  
28  
29  
30  
31  
32  
33  
34  
35  
36  
37  
38  
39  
40  
41  
42  
43  
44  
45  
46  
47  
48  
49  
50  
51  
52  
53  
54  
55  
56  
57  
58  
59  
60

For peer review only

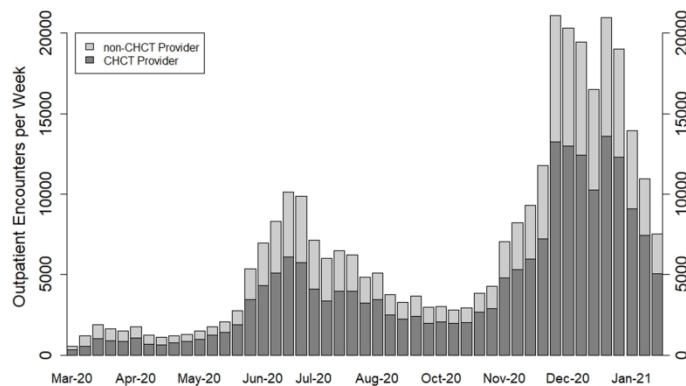

The figure shows the number of COVID-19-related outpatient encounters per week depending on whether providers were part of COVID-19 Home Care Team (dark grey) or not (light grey). The bars shown are stacked.

338x190mm (300 x 300 DPI)

# BMJ Open

## Evaluation of an outreach program for patients with COVID-19 in an integrated healthcare delivery system: a retrospective cohort study

|                                 |                                                                                                                                                                                                                                                                                                                                                                                                                                                                                                                                                                                                                 |
|---------------------------------|-----------------------------------------------------------------------------------------------------------------------------------------------------------------------------------------------------------------------------------------------------------------------------------------------------------------------------------------------------------------------------------------------------------------------------------------------------------------------------------------------------------------------------------------------------------------------------------------------------------------|
| Journal:                        | <i>BMJ Open</i>                                                                                                                                                                                                                                                                                                                                                                                                                                                                                                                                                                                                 |
| Manuscript ID                   | bmjopen-2023-073622.R1                                                                                                                                                                                                                                                                                                                                                                                                                                                                                                                                                                                          |
| Article Type:                   | Original research                                                                                                                                                                                                                                                                                                                                                                                                                                                                                                                                                                                               |
| Date Submitted by the Author:   | 14-Nov-2023                                                                                                                                                                                                                                                                                                                                                                                                                                                                                                                                                                                                     |
| Complete List of Authors:       | Myers, Laura ; Kaiser Permanente, Division of Research; The Permanente Medical Group Inc<br>Lawson, Brian L.; Kaiser Permanente, Division of Research<br>Escobar, Gabriel; Kaiser Permanente, Division of Research; The Permanente Medical Group Inc<br>Daly, Kathleen ; Kaiser Permanente, Division of Research; The Permanente Medical Group Inc<br>Chen, Yi-fen; The Permanente Medical Group Inc<br>Dlott, Richard; The Permanente Medical Group Inc<br>Lee, Catherine; Kaiser Permanente, Division of Research<br>Liu, Vincent; Kaiser Permanente, Division of Research; The Permanente Medical Group Inc, |
| <b>Primary Subject Heading</b>: | Infectious diseases                                                                                                                                                                                                                                                                                                                                                                                                                                                                                                                                                                                             |
| Secondary Subject Heading:      | Infectious diseases, Public health                                                                                                                                                                                                                                                                                                                                                                                                                                                                                                                                                                              |
| Keywords:                       | COVID-19, PUBLIC HEALTH, Public health < INFECTIOUS DISEASES                                                                                                                                                                                                                                                                                                                                                                                                                                                                                                                                                    |
|                                 |                                                                                                                                                                                                                                                                                                                                                                                                                                                                                                                                                                                                                 |

SCHOLARONE™  
Manuscripts



I, the Submitting Author has the right to grant and does grant on behalf of all authors of the Work (as defined in the below author licence), an exclusive licence and/or a non-exclusive licence for contributions from authors who are: i) UK Crown employees; ii) where BMJ has agreed a CC-BY licence shall apply, and/or iii) in accordance with the terms applicable for US Federal Government officers or employees acting as part of their official duties; on a worldwide, perpetual, irrevocable, royalty-free basis to BMJ Publishing Group Ltd ("BMJ") its licensees and where the relevant Journal is co-owned by BMJ to the co-owners of the Journal, to publish the Work in this journal and any other BMJ products and to exploit all rights, as set out in our [licence](#).

The Submitting Author accepts and understands that any supply made under these terms is made by BMJ to the Submitting Author unless you are acting as an employee on behalf of your employer or a postgraduate student of an affiliated institution which is paying any applicable article publishing charge ("APC") for Open Access articles. Where the Submitting Author wishes to make the Work available on an Open Access basis (and intends to pay the relevant APC), the terms of reuse of such Open Access shall be governed by a Creative Commons licence – details of these licences and which [Creative Commons](#) licence will apply to this Work are set out in our licence referred to above.

Other than as permitted in any relevant BMJ Author's Self Archiving Policies, I confirm this Work has not been accepted for publication elsewhere, is not being considered for publication elsewhere and does not duplicate material already published. I confirm all authors consent to publication of this Work and authorise the granting of this licence.



1  
2  
3 **Evaluation of an outreach program for patients with COVID-19 in an integrated**  
4 **healthcare delivery system: a retrospective cohort study**  
5

6 Running title: *Outreach program during COVID-19 pandemic*  
7

8  
9 Laura C. Myers, MD, MPH<sup>1,2</sup>, Brian L. Lawson, PhD<sup>1</sup>, Gabriel J. Escobar, MD<sup>1,2</sup>,  
10 Kathleen A. Daly, BS<sup>1,2</sup>, Yi-Fen Chen, MD<sup>2</sup>, Richard Dlott, MD<sup>2</sup>, Catherine Lee, PhD<sup>1</sup>,  
11 Vincent X. Liu, MD, MS<sup>1,2</sup>  
12

- 13  
14 1. Division of Research, Kaiser Permanente Northern California, Oakland CA  
15 2. The Permanente Medical Group, Kaiser Permanente Northern California, Oakland  
16 CA  
17

18 *Corresponding Author:*

19 Laura C. Myers MD MPH  
20 Kaiser Permanente Northern California  
21 Division of Research  
22 2000 Broadway  
23 Oakland, CA 94612  
24 Email: [Laura.c.myers@kp.org](mailto:Laura.c.myers@kp.org) ORCID: 0000-0002-2872-3388  
25 Twitter handle: @MDqualitysafety Telephone: (925) 433-3491  
26  
27

28 **Key words:** COVID-19, outreach program  
29

30 **Word Count:**

31 Abstract: 298

32  
33 Main: 3,259  
34

35 **Conflicts of Interest/Disclosures:** The authors report no conflicts of interest. The work  
36 is not under consideration elsewhere for publication. Dr. Escobar had full access to the  
37 data.  
38  
39  
40  
41  
42  
43  
44  
45  
46  
47  
48  
49  
50  
51  
52  
53  
54  
55  
56  
57  
58  
59  
60

## ABSTRACT

**Objectives:** In the first year of the coronavirus disease 2019 (COVID-19) pandemic, health systems implemented programs to manage outpatients with COVID-19. The goal was to expedite patients' referral to acute care and prevent overcrowding of medical centers. We sought to evaluate the impact of such a program, the COVID-19 Home Care Team (CHCT) program.

**Design:** Retrospective cohort

**Setting:** Kaiser Permanente Northern California

**Participants:** Adult members before COVID-19 vaccine availability (2/1/2020-1/31/2021) with positive SARS-CoV-2 tests

**Intervention:** Virtual program to track and treat patients with COVID-19 "CHCT program."

**Outcomes:** Outcomes were 1) COVID-19-related emergency department visit, 2) COVID-19-related hospitalization, 3) inpatient mortality or 30-day hospice referral.

**Measures** We estimated the average effect comparing patients who were and were not treated by CHCT. We estimated propensity scores using an ensemble super learner (random forest, XGBoost, Generalized Additive Model and Multivariate Adaptive Regression Splines) and augmented inverse probability weighting.

**Results:** There were 98,585 patients with COVID-19. The majority were followed by CHCT (n=80,067, 81.2%). Patients followed by CHCT were older (mean age 43.9 vs 41.6 years,  $P<0.001$ ) and more comorbid with COPS2 score  $\geq 65$  (1.7% vs 1.1%,  $P<0.001$ ). Unadjusted analyses showed more COVID-19-related emergency department visits (9.5% vs 8.5%,  $P<0.001$ ) and hospitalizations (3.9% vs 3.2%,

1  
2  
3 P<0.001) in patients followed by CHCT but lower inpatient death or 30-day hospice  
4 referral (0.3% vs 0.5%, P<0.001). After weighting, there were higher rates of COVID-19-  
5 related emergency department visits (estimated intervention effect -0.8%, 95% CI -  
6 1.4%, -0.3%) and hospitalization (-0.5%, 95% CI -0.9%, -0.1%) but lower inpatient  
7 mortality or 30-day hospice referral (-0.5%, 95% CI -0.7%, -0.3%) in patients followed  
8 by CHCT.  
9  
10  
11  
12  
13  
14  
15

16  
17 **Conclusions:** Despite CHCT following older patients with higher comorbidity burden,  
18 there appeared to be a protective effect. Patients followed by CHCT were more likely to  
19 present to acute care and less likely to die inpatient.  
20  
21  
22  
23  
24  
25  
26  
27  
28  
29  
30  
31  
32  
33  
34  
35  
36  
37  
38  
39  
40  
41  
42  
43  
44  
45  
46  
47  
48  
49  
50  
51  
52  
53  
54  
55  
56  
57  
58  
59  
60

## FUNDING

This work was supported by The Permanente Medical Group, Inc., (award/grant number N/A) and Kaiser Foundation Hospitals, Inc. (award/grant number N/A). Dr. Vincent Liu was also supported by NIH grant R35GM128672. The funder(s) had no involvement in the study design; in the collection, analysis and interpretation of the data; in the writing of the report; and in the decision to submit the paper for publication.

## STRENGTHS AND LIMITATIONS OF THIS STUDY

- While the program was not randomized, a natural control group was utilized, when demand for the program (number of cases) went above capacity of the program.
- We ensured that patients included in the control group would have been eligible for the intervention had it been available and carefully defined the time period to be prior to vaccine availability.
- Robust methods were used to conduct the analysis (propensity scores with ensemble super learner and augmented inverse probability weighting).

## INTRODUCTION

The coronavirus disease 2019 (COVID-19) pandemic posed many operational challenges for health systems. During each pandemic wave, bed demand exceeded supply, causing strain within the system to accommodate the influx of patients.[1] Units had to adapt to treat patients with acute respiratory failure outside of the intensive care unit, non-urgent outpatient procedures were delayed, and providers were needed to work additional shifts.[2, 3] Several studies have documented higher inpatient mortality during inpatient surge periods.[4-7]

Considerable attention has been given to outcomes of patients hospitalized with COVID-19.[6, 8-12] However, limited attention has been given to outpatient care of patients with COVID-19, including managing increased volume of secure messages and clinic visits and developing guidelines for triage to the acute care setting. Integrated health systems have the unique capability of managing patients across inpatient and outpatient settings, providing opportunities to intervene prior to their reaching the acute care setting and expediting their arrival to the acute care setting when necessary. Providing care upstream can reduce emergency department overcrowding by managing patients at home or by outpatient-only touchpoints. Additionally, referring patients early to acute care centers that have capacity, even if physically located further away, prevents overcrowding and actually expedites care. Also, having a handle on the number of referrals made to the emergency department allows providers to call in more staff to assist in triaging and managing patients in a timely way.

In the first year of the pandemic, Kaiser Permanente Northern California (KPNC) repurposed resources to accommodate the increased demands on the healthcare

1  
2  
3 system to support primary care physicians, manage patients with COVID-19 in the  
4 outpatient setting as much as possible and then expedite their referral to an acute care  
5 center that was not overcrowded. The novel intervention was COVID-19 Home Care  
6 Team (CHCT), which provided a coordinated system to track and treat outpatients who  
7 developed COVID-19. We sought to evaluate the impact of the CHCT program on risk  
8 of hospitalization and death.  
9  
10  
11  
12  
13  
14  
15  
16  
17  
18

## 19 **METHODS**

20  
21 This is a retrospective cohort study. The work was approved, and informed  
22 consent was waived by the Kaiser Permanente Northern California Institutional Review  
23 Board (#1634347). A STROBE checklist is presented in the Supplemental Methods.  
24  
25  
26  
27  
28  
29  
30

### 31 **Setting**

32  
33 Kaiser Permanente Northern California is an integrated healthcare delivery  
34 system that cares for 30% of the population in northern California. Under a mutual  
35 exclusivity agreement, 9,500 physicians of The Permanente Medical Group provide  
36 integrated healthcare for >4.4 million Kaiser Foundation Health Plan members at 21  
37 hospitals owned by Kaiser Foundation Hospitals and 242 medical office buildings.  
38  
39  
40  
41  
42  
43  
44  
45  
46

### 47 **Study Population**

48  
49 To establish our base population, we identified all records of members who were  
50  $\geq 18$  years old as of 2/1/2020 who had a positive SARS-CoV-2 polymerase chain  
51 reaction test ordered between 2/1/2020-1/31/2021. Prior to 3/13/2020, SARS-CoV-2  
52  
53  
54  
55  
56  
57  
58  
59  
60

1  
2  
3 tests were performed by the Centers for Disease Control and Prevention and  
4 state/county health departments, but the results were uploaded into our electronic  
5 health record system and available in KPNC databases. If a patient had multiple  
6 positive tests, we examined characteristics and outcomes of the first positive test. The  
7 study end date was chosen because it was prior to widespread dissemination of  
8 vaccinations for SARS-CoV-2. We excluded patients who were not eligible for CHCT  
9 service, such as those who had first positive test during or after a COVID-19-related  
10 emergency department visit or hospitalization. We also excluded patients who were  
11 hospitalized within 48 hours of their positive test, because contact with the CHCT team  
12 took up to 48 hours to initiate.  
13  
14  
15  
16  
17  
18  
19  
20  
21  
22  
23  
24  
25  
26  
27

### 28 **Variable Extraction**

29  
30 We examined patients' electronic health records for demographic and clinical  
31 variables, including the following data elements: self-reported race and ethnicity (in  
32 order to show the delivery of CHCT across a population),<sup>[13]</sup> individual comorbid  
33 conditions based on diagnosis codes, and neighborhood deprivation index, a composite  
34 index ranging from -5 to 5 with more positive values reflecting lower socioeconomic  
35 status.<sup>[14]</sup> We also captured 2 composite indices that are assigned to adults in the  
36 KPNC system: a longitudinal comorbidity score (COMorbidity Point Score, version 2  
37 [COPS2]) and an outpatient physiology-based severity of illness score (abbreviated  
38 Laboratory-based Acute Physiology Score [abLAPS]). Each month, all adults with a  
39 KPNC medical record number are assigned COPS2, which is based on diagnoses  
40 accrued in the preceding 12 months with higher scores associated with increasing  
41  
42  
43  
44  
45  
46  
47  
48  
49  
50  
51  
52  
53  
54  
55  
56  
57  
58  
59  
60

1  
2  
3 mortality risk.[15] They are also assigned a monthly abLAPS score, which is based on  
4  
5 14 laboratory tests obtained in the preceding month; higher scores are associated with  
6  
7 increased physiologic derangement.[13, 16] These variables are more fully described in  
8  
9 published studies.[15, 17-19]  
10  
11  
12  
13

## 14 **Exposure**

15  
16  
17 Prior to the pandemic, KPNC had several existing population health programs for  
18  
19 non-pregnant adults with chronic conditions (e.g., diabetes,[20-22] cancer  
20  
21 screening,[23, 24] cardiovascular disease[25]). In addition, a variety of follow-up  
22  
23 processes existed to support primary care providers, such as combinations of in-person  
24  
25 and automated outreach for management of hypertensive patients.[26, 27] At the start  
26  
27 of the pandemic, KPNC leadership utilized this population health management  
28  
29 infrastructure to develop a novel outpatient population health program, CHCT, with the  
30  
31 goal of increasing frontline primary care provider support by re-purposing non-physician  
32  
33 staff, including nurses and nurse practitioners, as well as physicians from departments  
34  
35 outside Adult and Family Medicine. After the State of California issued a Shelter in  
36  
37 Place order in March 2020, non-emergent surgeries, procedures (e.g., routine cervical  
38  
39 cancer screening, colonoscopies), and routine specialty follow-up appointments were  
40  
41 deprioritized. KPNC was thus able to repurpose ~450 non-AFM physicians from over 20  
42  
43 specialties as well as non-physician staff to assist in assessing and caring for COVID-19  
44  
45 patients using standardized protocols which provided recommendations for when to  
46  
47 triage patients to a higher level of care. All CHCT staff underwent formal training by the  
48  
49 medical director (RD). CHCT provided individualized follow-up of patients with early  
50  
51  
52  
53  
54  
55  
56  
57  
58  
59  
60



1  
2  
3 COVID-19 infection including education, assessment, and, if indicated, explicit  
4  
5 directions for how to access emergency department care.  
6

7  
8 CHCT was designed based on Kaiser Permanente Northern California's 20+  
9  
10 years of doing population care. The framework for the program was "Right patients,  
11  
12 right clinicians, right tools, right oversight." Starting in March 2020, patients were  
13  
14 electronically enrolled in CHCT when they developed a positive SARS-CoV-2 test.  
15  
16 Program staff attempted to reach patients by phone soon after they were informed of  
17  
18 their positive test result (usually within 24 hours after a positive result, including  
19  
20 weekends). The population care platform that was embedded in the electronic medical  
21  
22 record allowed CHCT to document outreach attempts so that multiple outreach attempts  
23  
24 could be made. The platform allowed staff to easily record outreach attempts, customize  
25  
26 follow-up intervals via electronic reminders, and track multiple contact attempts per day.  
27  
28 As most members were KP.org active for secure messaging, self-care instructions and  
29  
30 care resource information were echoed by program staff to eligible patients. Patients  
31  
32 received in the mail a kit of supplies, including a pulse oximeter, to prevent them from  
33  
34 needing to enter the public domain while contagious. Patients active on KPNC's web  
35  
36 portal were sent an automated personal message with links to information about  
37  
38 available resources and advice on managing their symptoms. Examples of patients who  
39  
40 were prioritized for outreach and follow up had a history of organ transplant,  
41  
42 supplemental oxygen at home and active treatment for cancer. Patients at moderate  
43  
44 risk were those aged >60, uncontrolled diabetes, cardiac or emergency department  
45  
46 within 30 days. Patients with no high risk features were offered an e-visit first. Based on  
47  
48 standardized protocols developed by front line physicians, patients were escalated to  
49  
50  
51  
52  
53  
54  
55  
56  
57  
58  
59  
60

1  
2  
3 video visits, in-person outpatient visits or acute care (emergency department). During  
4  
5 COVID-19 surges, the number of patients with positive tests exceeded CHCT  
6  
7 bandwidth, which provided a natural control group of patients who were not followed by  
8  
9 CHCT that could be used to compare outcomes. Those who were attempted to be  
10  
11 reached at least once were included in the intervention group. Additional information  
12  
13 about the program is available in the Supplemental Methods.  
14  
15  
16  
17  
18

## 19 Outcome

20  
21 The primary outcome was COVID-19-related acute care utilization. We examined  
22  
23 1) COVID-19-related emergency department visit or 2) COVID-19-related hospitalization  
24  
25 within 2 weeks of positive test. Attribution of hospitalizations to COVID-19 was based on  
26  
27 *International Classification of Diseases, Version 10* codes, timing of test orders and  
28  
29 non-elective status using a previously published algorithm.[19][28] As a secondary  
30  
31 outcome, we also examined the composite outcome of inpatient mortality or hospice  
32  
33 referral within 30 days after a positive test as we and others have done in the past.[6,  
34  
35  
36  
37  
38  
39  
40  
41  
42  
43  
44  
45  
46  
47  
48  
49  
50  
51  
52  
53  
54  
55  
56  
57  
58  
59  
60  
13]

## 42 Statistical Analysis

43  
44 We report mean with standard deviation or median with interquartile range for  
45  
46 continuous variables. We report number with percent for categorical variables. We  
47  
48 compare univariate values with T tests, Wilcoxon rank sum tests or Chi Squared tests,  
49  
50 as appropriate.  
51  
52  
53  
54  
55  
56  
57  
58  
59  
60

1  
2  
3 For each outcome, we estimated the average treatment effect of the CHCT  
4 program, comparing patients who were enrolled in CHCT to those who were not using  
5 an augmented inverse probability weighting (AIPW)[29] estimator. In AIPW, models are  
6 developed for the propensity of treatment and outcome probability as a function of  
7 covariates, utilizing all available data. AIPW has the appealing property that only one of  
8 the models needs to be specified correctly, known as “doubly robust.” We implemented  
9 the approach using the AIPW R package[30] that employs the ensemble machine  
10 learning approach Super Learner (random forest, XGBoost, Generalized Additive Model  
11 and Multivariate Adaptive Regression Splines) to estimate the probability models. The  
12 following variables were used in both the propensity score and outcome probability  
13 models: age, sex, neighborhood deprivation index, abLAPS, COPS2, obesity, diabetes,  
14 hypertension and month of the pandemic. These three comorbidities were chosen  
15 because they are highly prevalent in patients with COVID-19 and impact mortality.[31]  
16 Month of the pandemic was included because outcomes of patients have improved over  
17 time.[6, 11, 32] We reported the standardized between-group differences in covariates  
18 before and after inverse probability weighting based on the propensity score. We also  
19 reported the AIPW adjusted outcome prevalence depending on whether patients were  
20 followed by CHCT or not and the estimated intervention effect with 95% confidence  
21 interval, which is the average treatment effect.[30] Threshold for significance was <0.05.  
22  
23  
24  
25  
26  
27  
28  
29  
30  
31  
32  
33  
34  
35  
36  
37  
38  
39  
40  
41  
42  
43  
44  
45  
46  
47  
48

### 49 **Patient involvement**

50 Patients were not involved in the design or conduct of the study.  
51  
52  
53  
54  
55  
56  
57  
58  
59  
60

## RESULTS

There were 98,585 patients with positive tests, the majority of whom were followed by CHCT (n=80,067, 81.2%). Very few patients (n=18) died in the 4 weeks after a positive test without hospitalization, and there was no difference in the percentage who died depending on whether they were followed by CHCT (n=16, 5.1%) or not (n=2, 4.9%, P=0.40). Patients followed by CHCT were older (mean age 43.9 compared to 41.6 years, P<0.001) and more comorbid with COPS2 score  $\geq 65$  (1.7% vs 1.1%, P<0.001, **Table 1**). They were less likely to be male (45.0% vs 49.3%, P<0.001). Patients studied were diverse with 14.0% Asian, 43.7% Hispanic and 5.8% Black. They were also more likely to have diabetes (11.4% vs 5.7%, P<0.001), obesity (7.6% vs 4.8%, P<0.001) and hypertension (13.7% vs 8.4%, P<0.001). The majority of patients (n=69,150, 70.1%) had positive tests during the third wave of the pandemic (10/15/20-1/31/21). The time from positive test result to first contact with CHCT staff was median 1 day (IQR 0, 4). In the 30 days after positive test, the median time until first ambulatory encounter was 1 day (IQR 1,4) for patients followed by CHCT and 3 days (1,7) for patients not followed by CHCT. The median time between positive test until presentation to acute care (emergency department) was 4 days (IQR 2,7) for those followed by CHCT and 4 days (IQR 1,8) for those not followed by CHCT.

The overall raw outcome rates were the following: 9.3% had COVID-19-related emergency department visits, 3.8% had COVID-19-related hospitalizations and 0.4% had inpatient death or 30-day hospice referral (**Table 1**). There were more COVID-19-related emergency department visits (9.5% vs 8.5%, P<0.001) and hospitalizations

1  
2  
3 (3.9% vs 3.2%,  $P < 0.001$ ) in patients followed by CHCT but lower inpatient death or 30-  
4  
5 day hospice referral (0.3% vs 0.5%,  $P < 0.001$ ).  
6

7  
8 **Table 2** shows the standardized differences in characteristics between patients  
9  
10 followed by CHCT and not followed by CHCT. After inverse probability weighting, there  
11  
12 were no significant differences in standardized differences of characteristics, as  
13  
14 expected. After AIPW, there appeared to be a protective effect from the program. There  
15  
16 were higher rates of COVID-19-related emergency department visits (estimated  
17  
18 intervention effect -0.8%, 95% CI -1.4%, -0.3%) and hospitalizations (-0.5%, 95% CI  
19  
20 -0.9%, -0.1%, **Table 3**) and lower inpatient mortality or 30-day hospice referral (-0.5%,  
21  
22 95% CI -0.7%, -0.3%).  
23  
24  
25

26  
27 The volume of COVID-19-related outpatient visits increased dramatically during  
28  
29 the 3 waves of the pandemic. The majority was conducted by CHCT providers (dark  
30  
31 portion of stacked bar chart, **Figure 1**), demonstrating an offloading of outpatient work  
32  
33 to CHCT providers. In the 30 days after a positive test, patients followed by CHCT had  
34  
35 the following encounter types (71% telephone only, 6% video only, 23% both), and  
36  
37 patients not followed by CHCT had the following encounter types (70% telephone only,  
38  
39 16% video only, 12% both). In the 30 days after a positive test, patients followed by  
40  
41 CHCT had encounters with the following clinicians (58% MD only, 10% RN only, 32%  
42  
43 both), and patients not followed by CHCT had encounters with the following clinicians  
44  
45 (96% MD only, 1% RN only, 3% both).  
46  
47  
48  
49  
50  
51  
52  
53  
54  
55  
56  
57  
58  
59  
60

## DISCUSSION

Using population-level data from an integrated health system and robust methods (AIPW), we found a protective effect of an outpatient management program for COVID-19 which was implemented very early in the pandemic to manage patients at home and expedite their referral to acute care when needed. Patients followed by CHCT were older and had higher comorbidity burden, which argues against the possibility of cherry picking. We interpret the results to mean that patients followed by CHCT were more likely to be referred to acute care because of proactive outpatient outreach and monitoring, which likely explains the lower inpatient mortality or 30-day referral to hospice. We showed that there were drastic increases in the volume of COVID-19-related outpatient visits during the 3 surge periods and that much of the outpatient COVID-19-related visits were conducted by CHCT providers, demonstrating an offloading of outpatient burden by the program. We believe these findings are important to disseminate as other health systems struggle to manage entire populations of patients through the waves of the current pandemic. The program is scalable and generalizable, as the program itself is delivered completely virtually.

Strain is a term that refers to the time when a clinical care team's ability to provide high quality care is exceeded due to high occupancy, acuity, or turnover. During the pandemic, the Centers for Disease Control and Prevention estimated that if the critical care bed capacity reached 75% nationwide, 12,000 (95% CI=8,623–17,294) excess deaths would occur nationally 2 weeks later.[7] Preventing emergency room overcrowding due to unnecessary visits during periods of high transmission was critical to prevent strain-related deaths.[7, 33-35] Programs such as CHCT attempted to

1  
2  
3 streamline the management of patients with COVID-19 in the outpatient setting and to  
4  
5 facilitate appropriate emergency room care when patients demonstrate the need for  
6  
7 acute care.  
8  
9

10 It is important to evaluate real-world programs, such as CHCT, that can impact  
11  
12 outcomes for a population of patients. Patients with early COVID-19 had tremendous  
13  
14 need for both outpatient and inpatient care. One analysis reported patients required 5.6-  
15  
16 9 visits in the 30 days after the diagnosis depending on whether they ultimately were  
17  
18 hospitalized.[36] Given the rapidity of the onset of the pandemic, this demand for  
19  
20 healthcare resources strained our healthcare system. We showed that the majority of  
21  
22 COVID-19-related outpatient visits were managed by CHCT providers, repurposed from  
23  
24 specialties who had capacity at certain points during the pandemic. Additionally, the  
25  
26 majority of CHCT encounters were via telephone, which required fewer resources than  
27  
28 video or in-person visits. In this study, we demonstrated the management of large  
29  
30 demand upswings due to deployment and redeployment of resources which had a  
31  
32 positive impact on patient care.  
33  
34  
35  
36  
37

38 Other programs like CHCT have been implemented and described in the  
39  
40 literature. The direction of our results (favoring program benefit) is consistent with the  
41  
42 other 3 programs described herein, but the details of the program and outcomes  
43  
44 measured differed. First, the Cleveland Clinic Home Monitoring Program included  
45  
46 telephone outreach to 3,975 patients after a positive SARS-CoV-2 test to assess  
47  
48 patients' symptoms and escalate their care.[37] They performed a matched propensity  
49  
50 score analysis and found lower odds of 30-day and 90-day outpatient visits and  
51  
52 hospitalization, but not emergency department visits. In our study, which evaluated a  
53  
54  
55  
56  
57  
58  
59  
60

1  
2  
3 program implemented at scale, we report more acute care hospitalization and improved  
4 clinical outcomes. Second, the University of Pennsylvania COVID Watch program was a  
5  
6 texting intervention whereby 3,488 patients received twice daily texts to inquire about  
7  
8 symptoms.[38] They performed a propensity score analysis and found a 64% relative  
9  
10 reduction in death for enrolled patients. They found patients were reporting to the  
11  
12 emergency department sooner and had more frequent telemedicine encounters. Our  
13  
14 program was implemented on a larger scale but found similar reduction in inpatient  
15  
16 mortality. Third, the Home Monitoring Program at Providence health system delivered  
17  
18 pulse oximeters and thermometers to the home and administered surveys in  
19  
20 English/Spanish to monitor symptoms over time.[39] The authors performed propensity  
21  
22 scores with inverse probability of treatment weighting. Of 4,358 participants, the  
23  
24 program was associated with more outpatient and emergency department encounters  
25  
26 and resulted in high enrollee satisfaction. This study did not report hospitalization rates  
27  
28 or rates of clinical outcomes, such as death.[39]

29  
30  
31  
32  
33  
34  
35  
36  
37  
38  
39  
40  
41  
42  
43  
44  
45  
46  
47  
48  
49  
50  
51  
52  
53  
54  
55  
56  
57  
58  
59  
60  
There are several limitations to the current analysis. We did not measure physician or patient satisfaction/experience related to the program. We also did not measure provider burnout created or alleviated by the program. In an effort to reach as many people as possible, the intervention was not randomized but we used the natural control group formed when program demand exceeded bandwidth.

There are several key takeaways and advantages to our study. We showed that patients followed by CHCT were older, more comorbid and from diverse racial backgrounds. While being older and more comorbid could have disfavored the program, we found higher rates of acute care utilization even after adjusting for confounding and



1  
2  
3 lower inpatient mortality or 30-day hospice referral. Additionally, we examined patients  
4 who had had at least 1 outreach by CHCT into the intervention group to make it harder  
5 to find a statistically significant difference between the groups. We ensured that patients  
6 included in the analysis were eligible for CHCT services, i.e., they were not hospitalized  
7 at the time of receiving a positive test or within 48 hours because it took CHCT 48 hours  
8 to initiate contact. We appropriately examined the period of the pandemic prior to  
9 widespread vaccination; including the post-vaccination period would complicate the  
10 interpretation of the result given that unvaccinated patients are more likely to be  
11 hospitalized for COVID-19 and may be less likely to engage with the program.[40, 41]  
12 We also demonstrated that the number of patients who died in the 4 weeks after a  
13 positive test were few and not different between whether they were followed by CHCT  
14 or not. We performed a robust analysis using AIPW and adjustment for confounding,  
15 including month of the pandemic,[34] and capitalized on the natural control group that  
16 occurred when program demand exceeded bandwidth.  
17  
18  
19  
20  
21  
22  
23  
24  
25  
26  
27  
28  
29  
30  
31  
32  
33  
34

35 In conclusion, we evaluated the KPNC CHCT program, which was developed  
36 and implemented early in the pandemic and at scale to manage rises in outpatient care  
37 needs related to COVID-19 surges. Despite CHCT following older patients with higher  
38 comorbidity burden, there appeared to be a protective effect with higher likelihood of  
39 presenting to acute care but lower likelihood of inpatient mortality. We found the  
40 program was successful in offloading outpatient clinical care onto repurposed providers  
41 during the early part of the pandemic. This type of program is scalable for future waves  
42 of the COVID-19 pandemic or future pandemics.  
43  
44  
45  
46  
47  
48  
49  
50  
51  
52  
53  
54  
55  
56  
57  
58  
59  
60

1  
2  
3 **FIGURE LEGEND**  
4

5 The figure shows the number of COVID-19-related outpatient encounters per week  
6 depending on whether providers were part of COVID-19 Home Care Team (dark grey)  
7 or not (light grey). The bars shown are stacked.  
8  
9  
10  
11  
12

13 **Figure 1: Offloading of outpatient COVID-19 related visits to CHCT providers**  
14  
15  
16  
17  
18  
19  
20  
21  
22  
23  
24  
25  
26  
27  
28  
29  
30  
31  
32  
33  
34  
35  
36  
37  
38  
39  
40  
41  
42  
43  
44  
45  
46  
47  
48  
49  
50  
51  
52  
53  
54  
55  
56  
57  
58  
59  
60

## ACKNOWLEDGMENTS

We wish to thank the Kaiser Permanente Division of Research Strategic Programming Group for formatting the dataset and The Permanente Medical Group Consulting Services for consulting on data extraction and analysis.

## AUTHOR CONTRIBUTIONS

LCM is the corresponding author and guarantor for the study. LCM, BLL, GJE, YFC, RD, CL, and VXL conceptualized the project. LCM, GJE, VXL, BLL, CL, YFC contributed to the data curation, formal analysis, and methodology. KAD provided administrative support and contributed to generating tables and figure. LCM wrote the first draft of the manuscript, with subsequent editing done by listed co-authors; following this, LCM and KAD prepared the final version which is submitted here.

## DATA SHARING STATEMENT

### DATASETS NOT PUBLICLY AVAILABLE

The datasets generated and/or analyzed during the current study are not publicly available due to their being the property of Kaiser Foundation Health Plan, Inc., but are available to interested collaborators in the context of a formal collaboration approved by the Kaiser Permanente Northern California Institutional Review Board for the Protection of Human Subjects.

1  
2  
3  
4  
5  
6  
7  
8  
9  
10  
11  
12  
13  
14  
15  
16  
17  
18  
19  
20  
21  
22  
23  
24  
25  
26  
27  
28  
29  
30  
31  
32  
33  
34  
35  
36  
37  
38  
39  
40  
41  
42  
43  
44  
45  
46  
47  
48  
49  
50  
51  
52  
53  
54  
55  
56  
57  
58  
59  
60

**ETHICAL APPROVAL STATEMENT**

The work was approved, and informed consent was waived by the Kaiser Permanente Northern California Institutional Review Board (#1634347).

For peer review only

## REFERENCES

1. Myers, L.C. and V.X. Liu, *The COVID-19 Pandemic Strikes Again and Again and Again*. JAMA Netw Open, 2022. **5**(3): p. e221760.
2. Parodi, S.M. and V.X. Liu, *From Containment to Mitigation of COVID-19 in the US*. JAMA, 2020. **323**(15): p. 1441-1442.
3. Rouillard, S., V.X. Liu, and D.A. Corley, *COVID-19 and long-term planning for procedure-based specialties during extended mitigation and suppression strategies*. Gastroenterology, 2021. **160**(1): p. 4-9.
4. Dang, A., et al., *Hospitalizations and Mortality From Non-SARS-CoV-2 Causes Among Medicare Beneficiaries at US Hospitals During the SARS-CoV-2 Pandemic*. JAMA Netw Open, 2022. **5**(3): p. e221754.
5. Kadri, S.S., et al., *Association Between Caseload Surge and COVID-19 Survival in 558 U.S. Hospitals, March to August 2020*. Ann Intern Med, 2021. **174**(9): p. 1240-1251.
6. Asch, D.A., et al., *Variation in US Hospital Mortality Rates for Patients Admitted With COVID-19 During the First 6 Months of the Pandemic*. JAMA Intern Med, 2021. **181**(4): p. 471-478.
7. French, G., et al., *Impact of Hospital Strain on Excess Deaths During the COVID-19 Pandemic - United States, July 2020-July 2021*. MMWR Morb Mortal Wkly Rep, 2021. **70**(46): p. 1613-1616.
8. Jeganathan, N., S. Grewal, and M. Sathananthan, *Comparison of Deaths from COVID-19 and Seasonal Influenza in the USA*. Lung, 2021. **199**(5): p. 559-561.
9. Piroth, L., et al., *Comparison of the characteristics, morbidity, and mortality of COVID-19 and seasonal influenza: a nationwide, population-based retrospective cohort study*. Lancet Respir Med, 2021. **9**(3): p. 251-259.
10. Horwitz, L.I., et al., *Trends in COVID-19 Risk-Adjusted Mortality Rates*. J Hosp Med, 2020.
11. Anesi, G.L., et al., *Characteristics, outcomes, and trends of patients with COVID-19-related critical illness at a learning health system in the United States*. Ann Intern Med, 2021.
12. Myers, L.C., et al., *Characteristics of hospitalized adults with COVID-19 in an integrated health care system in California*. JAMA, 2020. **323**(21): p. 2195-2198.
13. Escobar GJ, A.A., Liu VX, Soltesz L, Chen YI, Parodi SM, Ray GT, Myers LC, Ramaprasad CM, Dlott R, Lee C., *Racial Disparities in COVID-19 Testing and Outcomes : Retrospective Cohort Study in an Integrated Health System*. Annals of Internal Medicine, 2020. **174**(6): p. 786-793.
14. Messer, L.C., et al., *The development of a standardized neighborhood deprivation index*. J Urban Health, 2006. **83**(6): p. 1041-62.
15. Escobar, G.J., et al., *Risk-adjusting hospital mortality using a comprehensive electronic record in an integrated health care delivery system*. Med Care, 2013. **51**(5): p. 446-53.
16. Escobar, G.J., et al., *Risk-adjusting hospital inpatient mortality using automated inpatient, outpatient, and laboratory databases*. Med Care, 2008. **46**(3): p. 232-9.
17. Escobar, G., et al., *Risk Adjusting Hospital Inpatient Mortality Using Automated Inpatient, Outpatient, and Laboratory Databases*. Medical Care, 2008. **46**(3): p. 232-39.
18. Escobar, G.J., et al., *Nonelective Rehospitalizations and Postdischarge Mortality: Predictive Models Suitable for Use in Real Time*. Medical care, 2015. **53**(11): p. 916-23.
19. Escobar, G.J., et al., *Racial Disparities in COVID-19 Testing and Outcomes : Retrospective Cohort Study in an Integrated Health System*. Ann Intern Med, 2021.
20. Sadur, C.N., et al., *Diabetes management in a health maintenance organization. Efficacy of care management using cluster visits*. Diabetes Care, 1999. **22**(12): p. 2011-7.

21. Schmittiel, J.A., et al., *The effectiveness of diabetes care management in managed care*. Am J Manag Care, 2009. **15**(5): p. 295-301.
22. Rana, J.S., et al., *Improved Cardiovascular Risk Factors Control Associated with a Large-Scale Population Management Program Among Diabetes Patients*. Am J Med, 2018. **131**(6): p. 661-668.
23. Doubeni, C.A., et al., *Association between Improved Colorectal Screening and Racial Disparities*. N Engl J Med, 2022. **386**(8): p. 796-798.
24. Mehta, S.J., et al., *Race/Ethnicity and Adoption of a Population Health Management Approach to Colorectal Cancer Screening in a Community-Based Healthcare System*. J Gen Intern Med, 2016. **31**(11): p. 1323-1330.
25. Rana, J.S., et al., *Improved Cardiovascular Risk Factors Control Associated with a Large-Scale Population Management Program Among Diabetes Patients*. The American Journal of Medicine, 2018. **131**(6): p. 661-668.
26. Jaffe, M.G., et al., *Improved blood pressure control associated with a large-scale hypertension program*. JAMA, 2013. **310**(7): p. 699-705.
27. Jaffe, M.G. and J.D. Young, *The Kaiser Permanente Northern California Story: Improving Hypertension Control From 44% to 90% in 13 Years (2000 to 2013)*. Journal of clinical hypertension, 2016. **18**(4): p. 260-1.
28. Myers, L.C., et al., *Trends in Outpatient Visits and Hospital and Intensive Care Unit Admissions of Adults With COVID-19 in an Integrated US Health Care System, March 2020 to January 2022*. JAMA Netw Open, 2023. **6**(1): p. e2253269.
29. Kurz, C.F., *Augmented Inverse Probability Weighting and the Double Robustness Property*. Med Decis Making, 2022. **42**(2): p. 156-167.
30. Zhong, Y., et al., *AIPW: An R Package for Augmented Inverse Probability-Weighted Estimation of Average Causal Effects*. Am J Epidemiol, 2021. **190**(12): p. 2690-2699.
31. Ko, J.Y., et al., *Risk Factors for Coronavirus Disease 2019 (COVID-19)-Associated Hospitalization: COVID-19-Associated Hospitalization Surveillance Network and Behavioral Risk Factor Surveillance System*. Clin Infect Dis, 2021. **72**(11): p. e695-e703.
32. Horby, P., et al., *Dexamethasone in hospitalized patients with COVID-19*. N Engl J Med, 2021. **384**(8): p. 693-704.
33. Anesi, G.L., et al., *Association of a Novel Index of Hospital Capacity Strain with Admission to Intensive Care Units*. Ann Am Thorac Soc, 2020. **17**(11): p. 1440-1447.
34. Anesi, G.L., et al., *Characteristics, Outcomes, and Trends of Patients With COVID-19-Related Critical Illness at a Learning Health System in the United States*. Ann Intern Med, 2021. **174**(5): p. 613-621.
35. Anesi, G.L., et al., *Associations of intensive care unit capacity strain with disposition and outcomes of patients with sepsis presenting to the emergency department*. Ann Am Thorac Soc, 2018. **15**(11): p. 1328-1335.
36. Huang, B.Z., et al., *Healthcare Utilization Among Patients Diagnosed with COVID-19 in a Large Integrated Health System*. J Gen Intern Med, 2022. **37**(4): p. 830-837.
37. Misra-Hebert, A.D., et al., *COVID-19 Home Monitoring After Diagnosis and Health Care Utilization in an Integrated Health System*. JAMA Health Forum, 2021. **2**(5): p. e210333-e210333.
38. Delgado, M.K., et al., *Comparative Effectiveness of an Automated Text Messaging Service for Monitoring COVID-19 at Home*. Ann Intern Med, 2022. **175**(2): p. 179-190.
39. Vartanian, K.B., et al., *Patient experience and healthcare utilization for a COVID-19 telemedicine home monitoring program offered in English and Spanish*. PLoS One, 2022. **17**(6): p. e0270754.
40. Kipnis P, et al., *Evaluation of Vaccination Strategies to Compare Efficient and Equitable Vaccine Allocation by Race and Ethnicity Across Time*. JAMA Health Forum, 2021(2(8)): p. e212095.

- 1  
2  
3 41. Myers, L.C., et al., *Adults hospitalized with breakthrough COVID-19 have lower mortality*  
4 *than matched unvaccinated adults.* J Intern Med, 2022.  
5  
6  
7  
8  
9  
10  
11  
12  
13  
14  
15  
16  
17  
18  
19  
20  
21  
22  
23  
24  
25  
26  
27  
28  
29  
30  
31  
32  
33  
34  
35  
36  
37  
38  
39  
40  
41  
42  
43  
44  
45  
46  
47  
48  
49  
50  
51  
52  
53  
54  
55  
56  
57  
58  
59  
60

**Table 1: Characteristics of patients with COVID-19+ who were and were not followed by COVID-19 Home Care Team**

|                                                    | All patients<br>n=98,585 | Patients<br>followed by<br>CHCT<br>n=80,067 | Patients not<br>followed by<br>CHCT<br>n=18,518 | P value |
|----------------------------------------------------|--------------------------|---------------------------------------------|-------------------------------------------------|---------|
| Age in years, mean (SD)                            | 43.47 (15.54)            | 43.90 (15.65)                               | 41.61 (14.91)                                   | <0.001  |
| Sex, male (%)                                      | 45,183 (45.8%)           | 36,052 (45.0%)                              | 9,131 (49.3%)                                   | <0.001  |
| Race, n (%)                                        |                          |                                             |                                                 |         |
| Asian                                              | 13,796 (14.0%)           | 10,890 (13.6%)                              | 2,906 (15.7%)                                   | <0.001  |
| Black                                              | 5,721 (5.8%)             | 4,541 (5.7%)                                | 1,180 (6.4%)                                    |         |
| Hispanic                                           | 43,082 (43.7%)           | 35,111 (43.9%)                              | 7,971 (43.0%)                                   |         |
| White                                              | 27,646 (28.0%)           | 22,958 (28.7%)                              | 4,688 (25.3%)                                   |         |
| Other/unknown race <sup>a</sup>                    | 8,340 (8.5%)             | 6,567 (8.2%)                                | 1,773 (9.6%)                                    |         |
| NDI (median, Q1-Q3) <sup>b</sup>                   | -0.07<br>[-0.61, 0.64]   | -0.08<br>[-0.63, 0.64]                      | -0.03<br>[-0.53, 0.62]                          | <0.001  |
| COPS2 (median, Q1-Q3) <sup>c</sup>                 | 10.0<br>[10.0, 10.0]     | 10.0<br>[10.0, 10.0]                        | 10.0<br>[10.0, 10.0]                            | <0.001  |
| COPS2 ≥ 65, n (%)                                  | 1555 (1.6%)              | 1,350 (1.7%)                                | 205 (1.1%)                                      | <0.001  |
| Comorbidities                                      |                          |                                             |                                                 |         |
| Diabetes, n (%)                                    | 10,176 (10.3%)           | 9,122 (11.4%)                               | 1,054 (5.7%)                                    | <0.001  |
| Obesity, n (%)                                     | 6,988 (7.1%)             | 6,105 (7.6%)                                | 883 (4.8%)                                      | <0.001  |
| Hypertension, n (%)                                | 12,505 (12.7%)           | 10,948 (13.7%)                              | 1,557 (8.4%)                                    | <0.001  |
| Chronic pulmonary disease, n (%)                   | 7,119 (7.2%)             | 6,142 (7.7%)                                | 977 (5.3%)                                      | <0.001  |
| Congestive heart failure, n (%)                    | 764 (0.8%)               | 665 (0.8%)                                  | 99 (0.5%)                                       | <0.001  |
| Cancer, n (%)                                      | 1,363 (1.4%)             | 1,173 (1.5%)                                | 190 (1.0%)                                      | <0.001  |
| abLAPS (median, Q1-Q3) <sup>d</sup>                | 0.0 [0.0, 0.0]           | 0.0 [0.0, 0.0]                              | 0.0 [0.0, 0.0]                                  | <0.001  |
| abLAPS ≥ 4, n (%)                                  | 3,219 (3.3%)             | 2,753 (3.4%)                                | 466 (2.5%)                                      | <0.001  |
| Wave, n (%)                                        |                          |                                             |                                                 | <0.001  |
| 1 (2/1/20-5/31/20)                                 | 2,476 (2.5%)             | 1,978 (2.5%)                                | 498 (2.7%)                                      | <0.001  |
| 2 (6/1/20-10/14/20)                                | 26,959 (27.3%)           | 21,580 (27.0%)                              | 5,379 (29.1%)                                   |         |
| 3 (10/15/20-1/31/21)                               | 69,150 (70.1%)           | 56,509 (70.6%)                              | 12,641 (68.3%)                                  |         |
| COVID-19-related emergency department visit, n (%) | 9,165 (9.3%)             | 7,587 (9.5%)                                | 1,578 (8.5%)                                    | <0.001  |
| COVID-19-related hospitalization, n (%)            | 3,703 (3.8%)             | 3,116 (3.9%)                                | 587 (3.2%)                                      | <0.001  |
| Inpatient death or 30-day hospice referral, n (%)  | 365 (0.4%)               | 265 (0.3%)                                  | 100 (0.5%)                                      | <0.001  |

Abbreviations: CHCT=Coronavirus disease 19 Home Care Team



**FOOTNOTE**

a Other race includes: American Indian, Alaska Native, Asian Pacific, Native Hawaiian, Pacific Islander, multiracial.

b Neighborhood deprivation index ranges between -5 to +5 with more positive values indicating lower status. See text of Messer et al. (2006) for additional detail.

c The COMorbidity Point Score, version 2 (COPS2) described in Escobar et al. (2013) is a score assigned every month to all adults with a Kaiser Permanente Northern California medical record number. Range is from 0 to 1010; higher scores indicate worse mortality risk. The univariate relationship between the COPS2 and 1-year mortality is as follows: 0-39, 0.3%; 40-64, 5.3%; 65+, 17.2%.

d The Abbreviated Laboratory-based Acute Physiology Score (abLAPS) is a monthly score employing 14 laboratory tests based on the LAPS score described in Escobar et al. (2008). Range is from 0 to 256; higher scores indicate increasing physiologic abnormalities in the preceding month. The univariate relationship between the abLAPS and 30-day mortality is as follows: 0-4, 0.06%; 4-9, 0.18%; 10+, 1.32%.

**Table 2: Selected characteristics of patients who were and were not followed by COVID-19 Home Care Team before and after weighting**

|                                | Before Weighting                      |                                           |                         | After Weighting           |                               |                            |
|--------------------------------|---------------------------------------|-------------------------------------------|-------------------------|---------------------------|-------------------------------|----------------------------|
|                                | Patients followed by CHCT<br>n=80,067 | Patients not followed by CHCT<br>n=18,518 | Standardized Difference | Patients followed by CHCT | Patients not followed by CHCT | Standardized Difference, % |
| Age, median (IQR)              | 43 [31, 55]                           | 40 [30, 52]                               | 0.15                    | 42 [31, 55]               | 42 [31, 55]                   | 0.01                       |
| Sex, male (%)                  | 36,052 (45.0%)                        | 9,131 (49.3%)                             | -0.09                   | 44,889.3 (45.7)           | 42,202.6 (45.9)               | 0.00                       |
| NDI, median (IQR) <sup>1</sup> | 0.08 [-0.63, 0.64]                    | 0.03 [-0.53, 0.62]                        | -0.04                   | -0.07 [-0.61, 0.64]       | -0.08 [-0.63, 0.63]           | 0.01                       |
| AbLAPS, median (IQR)           | 0.00 [0.00, 0.00]                     | 0.00 [0.00, 0.00]                         | 0.05                    | 0.00 [0.00, 0.00]         | 0.00 [0.00, 0.00]             | 0.02                       |
| COPS2, median (IQR)            | 10.00 [10.00, 10.00]                  | 10.00 [10.00, 10.00]                      | 0.10                    | 10.00 [10.00, 10.00]      | 10.00 [10.00, 10.00]          | 0.04                       |
| Obesity, n (%)                 | 6,105 (7.6%)                          | 883 (4.8%)                                | 0.13                    | 6991.7 (7.1)              | 6,693.1 (7.3)                 | -0.01                      |
| Diabetes, n (%)                | 9,122 (11.4%)                         | 1,054 (5.7%)                              | 0.25                    | 10,172.2 (10.4)           | 9,822.9 (10.7)                | -0.01                      |
| Hypertension, n (%)            | 10,948 (13.7%)                        | 1,557 (8.4%)                              | 0.19                    | 12,520.3 (12.8)           | 12,463.6 (13.6)               | -0.02                      |
| March 2020, n (%)              | 388 (0%)                              | 112 (1%)                                  | -0.02                   | 498.3 (0.5)               | 549.7 (0.6)                   | -0.01                      |
| April 2020, n (%)              | 719 (1%)                              | 199 (1%)                                  | -0.02                   | 915.4 (0.9)               | 903.9 (1.0)                   | -0.01                      |
| May 2020, n (%)                | 871 (1%)                              | 187 (1%)                                  | 0.01                    | 1,061.3 (1.1)             | 1,011.3 (1.1)                 | 0.00                       |
| June 2020, n (%)               | 3,687 (5%)                            | 827 (4%)                                  | 0.01                    | 4,538.3 (4.6)             | 4,310.7 (4.7)                 | 0.00                       |
| July 2020, n (%)               | 8,316 (10%)                           | 2,277 (12%)                               | -0.06                   | 10,575.5 (10.8)           | 10,142.7 (11.0)               | -0.01                      |
| August 2020, n (%)             | 5,087 (6%)                            | 1,290 (7%)                                | -0.02                   | 6,348.4 (6.5)             | 5,979.4 (6.5)                 | 0.00                       |
| September 2020, n (%)          | 3,118 (4%)                            | 703 (4%)                                  | 0.01                    | 3,803.9 (3.9)             | 3,628.0 (3.9)                 | 0.00                       |
| October 2020, n (%)            | 3,611 (5%)                            | 676 (4%)                                  | 0.05                    | 4,293.8 (4.4)             | 4,243.5 (4.6)                 | -0.01                      |
| November 2020, n (%)           | 10,888 (14%)                          | 2,416 (13%)                               | 0.02                    | 13,227.8 (13.5)           | 12,639.9 (13.8)               | -0.01                      |
| December 2020, n (%)           | 26,592 (33%)                          | 6,059 (33%)                               | 0.01                    | 32,458.2 (33.1)           | 29,917.7 (32.6)               | 0.01                       |
| January 2021, n (%)            | 16,790 (21%)                          | 3,772 (20%)                               | 0.01                    | 20,416.6 (20.8)           | 18,567.2 (20.2)               | 0.01                       |

Abbreviations: NDI=neighborhood deprivation index, COPS2=Comorbidity Point Score, Version 2, abLAPS=Abbreviated Laboratory-based Acute Physiology Score

**Table 3: Estimated intervention effect of COVID-19 Home Care Team**

| Outcome                                     | Adjusted outcome prevalence |         | Estimated intervention effect<br>(95% Confidence Interval) |
|---------------------------------------------|-----------------------------|---------|------------------------------------------------------------|
|                                             | CHCT                        | No CHCT |                                                            |
| COVID-19-related emergency department visit | 9.3%                        | 10.1%   | -0.8% (-1.4%, -0.3%)                                       |
| COVID-19-related hospitalization            | 3.8%                        | 4.3%    | -0.5% (-0.9%, -0.1%)                                       |
| Inpatient death or 30-day hospice referral  | 0.3%                        | 0.8%    | -0.5% (-0.7%, -0.3%)                                       |

The intervention effect being negative indicates a protective effect of the intervention.

1  
2  
3  
4  
5  
6  
7  
8  
9  
10  
11  
12  
13  
14  
15  
16  
17  
18  
19  
20  
21  
22  
23  
24  
25  
26  
27  
28  
29  
30  
31  
32  
33  
34  
35  
36  
37  
38  
39  
40  
41  
42  
43  
44  
45  
46  
47  
48  
49  
50  
51  
52  
53  
54  
55  
56  
57  
58  
59  
60

For peer review only



The figure shows the number of COVID-19-related outpatient encounters per week depending on whether providers were part of COVID-19 Home Care Team (dark grey) or not (light grey). The bars shown are stacked.

338x190mm (300 x 300 DPI)

1  
2  
3 **Evaluation of an outreach program for patients with COVID-19 in an integrated**  
4 **healthcare delivery system: a retrospective cohort study**  
5  
6

7  
8 Myers et al  
9

10  
11  
12 **Supplemental Methods**  
13

14 This study was approved by KPNC Institutional Review Board (Protocol #1045), who  
15 allowed a waiver of informed consent. See STROBE checklist below for details.  
16

17  
18 Outpatient encounters could be telephone, video or in-person clinic visits. We describe  
19 patients' clinical characteristics, including self-identified race, which we extracted  
20 electronically from the electronic health record. "Other" race included: American Indian,  
21 Alaska Native, Asian Pacific, Native Hawaiian, Pacific Islander, multiracial.  
22  
23  
24  
25  
26  
27  
28  
29  
30  
31  
32  
33  
34  
35  
36  
37  
38  
39  
40  
41  
42  
43  
44  
45  
46  
47  
48  
49  
50  
51  
52  
53  
54  
55  
56  
57  
58  
59  
60

**STROBE 2007 (v4) Statement—Checklist of items that should be included in reports of cohort studies**

| Section/Topic            | Item # | Recommendation                                                                                                                           | Reported on page # |
|--------------------------|--------|------------------------------------------------------------------------------------------------------------------------------------------|--------------------|
| Title and abstract       | 1      | (a) Indicate the study's design with a commonly used term in the title or the abstract                                                   | 1                  |
|                          |        | (b) Provide in the abstract an informative and balanced summary of what was done and what was found                                      | 2, 3               |
| <b>Introduction</b>      |        |                                                                                                                                          |                    |
| Background/rationale     | 2      | Explain the scientific background and rationale for the investigation being reported                                                     | 6                  |
| Objectives               | 3      | State specific objectives, including any prespecified hypotheses                                                                         | 7                  |
| <b>Methods</b>           |        |                                                                                                                                          |                    |
| Study design             | 4      | Present key elements of study design early in the paper                                                                                  | 7                  |
| Setting                  | 5      | Describe the setting, locations, and relevant dates, including periods of recruitment, exposure, follow-up, and data collection          | 7, 8               |
| Participants             | 6      | (a) Give the eligibility criteria, and the sources and methods of selection of participants. Describe methods of follow-up               | 7, 8               |
|                          |        | (b) For matched studies, give matching criteria and number of exposed and unexposed                                                      | NA                 |
| Variables                | 7      | Clearly define all outcomes, exposures, predictors, potential confounders, and effect modifiers. Give diagnostic criteria, if applicable | 8, 9, 10           |
| Data sources/measurement | 8      | For each variable of interest, give sources of data and details of methods of assessment (measurement). Describe comparability of        | 7, 8               |

|                        |    |                                                                                                                                                                                                   |    |
|------------------------|----|---------------------------------------------------------------------------------------------------------------------------------------------------------------------------------------------------|----|
|                        |    | assessment methods if there is more than one group                                                                                                                                                |    |
| Bias                   | 9  | Describe any efforts to address potential sources of bias                                                                                                                                         | 8  |
| Study size             | 10 | Explain how the study size was arrived at                                                                                                                                                         | 7  |
| Quantitative variables | 11 | Explain how quantitative variables were handled in the analyses. If applicable, describe which groupings were chosen and why                                                                      | 12 |
| Statistical methods    | 12 | (a) Describe all statistical methods, including those used to control for confounding                                                                                                             | 17 |
|                        |    | (b) Describe any methods used to examine subgroups and interactions                                                                                                                               | 12 |
|                        |    | (c) Explain how missing data were addressed                                                                                                                                                       | NA |
|                        |    | (d) If applicable, explain how loss to follow-up was addressed                                                                                                                                    | NA |
|                        |    | (e) Describe any sensitivity analyses                                                                                                                                                             | NA |
| <b>Results</b>         |    |                                                                                                                                                                                                   |    |
| Participants           | 13 | (a) Report numbers of individuals at each stage of study—eg numbers potentially eligible, examined for eligibility, confirmed eligible, included in the study, completing follow-up, and analysed | 13 |
|                        |    | (b) Give reasons for non-participation at each stage                                                                                                                                              | NA |
|                        |    | (c) Consider use of a flow diagram                                                                                                                                                                | NA |
| Descriptive data       | 14 | (a) Give characteristics of study participants (eg demographic, clinical, social) and information on exposures and potential confounders                                                          | 8  |
|                        |    | (b) Indicate number of participants with missing data for each variable of interest                                                                                                               | NA |
|                        |    | (c) Summarise follow-up time (eg, average and total amount)                                                                                                                                       | NA |



|                          |    |                                                                                                                                                                                                              |    |
|--------------------------|----|--------------------------------------------------------------------------------------------------------------------------------------------------------------------------------------------------------------|----|
| Outcome data             | 15 | Report numbers of outcome events or summary measures over time                                                                                                                                               | 13 |
| Main results             | 16 | (a) Give unadjusted estimates and, if applicable, confounder-adjusted estimates and their precision (eg, 95% confidence interval). Make clear which confounders were adjusted for and why they were included | 13 |
|                          |    | (b) Report category boundaries when continuous variables were categorized                                                                                                                                    | NA |
|                          |    | (c) If relevant, consider translating estimates of relative risk into absolute risk for a meaningful time period                                                                                             | NA |
| Other analyses           | 17 | Report other analyses done—eg analyses of subgroups and interactions, and sensitivity analyses                                                                                                               | 15 |
| <b>Discussion</b>        |    |                                                                                                                                                                                                              |    |
| Key results              | 18 | Summarise key results with reference to study objectives                                                                                                                                                     | 14 |
| <b>Limitations</b>       |    |                                                                                                                                                                                                              |    |
| Interpretation           | 20 | Give a cautious overall interpretation of results considering objectives, limitations, multiplicity of analyses, results from similar studies, and other relevant evidence                                   | 16 |
| Generalisability         | 21 | Discuss the generalisability (external validity) of the study results                                                                                                                                        | 16 |
| <b>Other information</b> |    |                                                                                                                                                                                                              |    |
| Funding                  | 22 | Give the source of funding and the role of the funders for the present study and, if applicable, for the original study on which the present article is based                                                | 1  |
