# Supplementary material for: Evaluation of an outreach programme for patients with COVID-19 in an integrated healthcare delivery system: a retrospective cohort study
Source: PubMed Central journal article supplement — BMJ Open. 2024 Jan 8;14(1):e073622. doi: 10.1136/bmjopen-2023-073622 (PMC10806839; doi:10.1136/bmjopen-2023-073622), 2024-01-08
Supplement: bmjopen-2023-073622supp001.pdf [file bmjopen-2023-073622supp001.pdf]

## **Evaluation of an outreach program for patients with COVID-19 in an integrated healthcare delivery system: a retrospective cohort study**

Myers et al

### **Supplemental Methods**

This study was approved by KPNC Institutional Review Board (Protocol #1045), who allowed a waiver of informed consent. See STROBE checklist below for details.

Outpatient encounters could be telephone, video or in-person clinic visits. We describe patients' clinical characteristics, including self-identified race, which we extracted electronically from the electronic health record. "Other" race included: American Indian, Alaska Native, Asian Pacific, Native Hawaiian, Pacific Islander, multiracial.

**STROBE 2007 (v4) Statement—Checklist of items that should be included in reports of *cohort studies***

| Section/Topic            | Item # | Recommendation                                                                                                                           | Reported on page # |
|--------------------------|--------|------------------------------------------------------------------------------------------------------------------------------------------|--------------------|
| Title and abstract       | 1      | (a) Indicate the study's design with a commonly used term in the title or the abstract                                                   | 1                  |
|                          |        | (b) Provide in the abstract an informative and balanced summary of what was done and what was found                                      | 2, 3               |
| <b>Introduction</b>      |        |                                                                                                                                          |                    |
| Background/rationale     | 2      | Explain the scientific background and rationale for the investigation being reported                                                     | 6                  |
| Objectives               | 3      | State specific objectives, including any prespecified hypotheses                                                                         | 7                  |
| <b>Methods</b>           |        |                                                                                                                                          |                    |
| Study design             | 4      | Present key elements of study design early in the paper                                                                                  | 7                  |
| Setting                  | 5      | Describe the setting, locations, and relevant dates, including periods of recruitment, exposure, follow-up, and data collection          | 7, 8               |
| Participants             | 6      | (a) Give the eligibility criteria, and the sources and methods of selection of participants. Describe methods of follow-up               | 7, 8               |
|                          |        | (b) For matched studies, give matching criteria and number of exposed and unexposed                                                      | NA                 |
| Variables                | 7      | Clearly define all outcomes, exposures, predictors, potential confounders, and effect modifiers. Give diagnostic criteria, if applicable | 8, 9, 10           |
| Data sources/measurement | 8      | For each variable of interest, give sources of data and details of methods of assessment (measurement). Describe comparability of        | 7, 8               |

|                        |    |                                                                                                                                                                                                   |    |
|------------------------|----|---------------------------------------------------------------------------------------------------------------------------------------------------------------------------------------------------|----|
|                        |    | assessment methods if there is more than one group                                                                                                                                                |    |
| Bias                   | 9  | Describe any efforts to address potential sources of bias                                                                                                                                         | 8  |
| Study size             | 10 | Explain how the study size was arrived at                                                                                                                                                         | 7  |
| Quantitative variables | 11 | Explain how quantitative variables were handled in the analyses. If applicable, describe which groupings were chosen and why                                                                      | 12 |
| Statistical methods    | 12 | (a) Describe all statistical methods, including those used to control for confounding                                                                                                             | 17 |
|                        |    | (b) Describe any methods used to examine subgroups and interactions                                                                                                                               | 12 |
|                        |    | (c) Explain how missing data were addressed                                                                                                                                                       | NA |
|                        |    | (d) If applicable, explain how loss to follow-up was addressed                                                                                                                                    | NA |
|                        |    | (e) Describe any sensitivity analyses                                                                                                                                                             | NA |
| <b>Results</b>         |    |                                                                                                                                                                                                   |    |
| Participants           | 13 | (a) Report numbers of individuals at each stage of study—eg numbers potentially eligible, examined for eligibility, confirmed eligible, included in the study, completing follow-up, and analysed | 13 |
|                        |    | (b) Give reasons for non-participation at each stage                                                                                                                                              | NA |
|                        |    | (c) Consider use of a flow diagram                                                                                                                                                                | NA |
| Descriptive data       | 14 | (a) Give characteristics of study participants (eg demographic, clinical, social) and information on exposures and potential confounders                                                          | 8  |
|                        |    | (b) Indicate number of participants with missing data for each variable of interest                                                                                                               | NA |
|                        |    | (c) Summarise follow-up time (eg, average and total amount)                                                                                                                                       | NA |

|                          |    |                                                                                                                                                                                                              |    |
|--------------------------|----|--------------------------------------------------------------------------------------------------------------------------------------------------------------------------------------------------------------|----|
| Outcome data             | 15 | Report numbers of outcome events or summary measures over time                                                                                                                                               | 13 |
| Main results             | 16 | (a) Give unadjusted estimates and, if applicable, confounder-adjusted estimates and their precision (eg, 95% confidence interval). Make clear which confounders were adjusted for and why they were included | 13 |
|                          |    | (b) Report category boundaries when continuous variables were categorized                                                                                                                                    | NA |
|                          |    | (c) If relevant, consider translating estimates of relative risk into absolute risk for a meaningful time period                                                                                             | NA |
| Other analyses           | 17 | Report other analyses done—eg analyses of subgroups and interactions, and sensitivity analyses                                                                                                               | 15 |
| <b>Discussion</b>        |    |                                                                                                                                                                                                              |    |
| Key results              | 18 | Summarise key results with reference to study objectives                                                                                                                                                     | 14 |
| <b>Limitations</b>       |    |                                                                                                                                                                                                              |    |
| Interpretation           | 20 | Give a cautious overall interpretation of results considering objectives, limitations, multiplicity of analyses, results from similar studies, and other relevant evidence                                   | 16 |
| Generalisability         | 21 | Discuss the generalisability (external validity) of the study results                                                                                                                                        | 16 |
| <b>Other information</b> |    |                                                                                                                                                                                                              |    |
| Funding                  | 22 | Give the source of funding and the role of the funders for the present study and, if applicable, for the original study on which the present article is based                                                | 1  |
